# Supplementary material
Source: PubMed Central journal article supplement (PMC6357781)
Supplement: NIHMS997695-supplement-Supp.pdf [file NIHMS997695-supplement-Supp.pdf]

## SUPPLEMENTARY DATA

### LIST OF SUPPLEMENTARY MATERIALS

Supplementary Materials and Methods.

Fig. S1. Maturation of and cycling of LN CD8<sup>+</sup> T cells

Fig. S2. CD69 expression on naïve CD8<sup>+</sup> T cells and immune activation profile of CD69<sup>-</sup> and CD69<sup>+</sup> CD8<sup>+</sup> T cells in LTs

Fig. S3. Phenotypic characteristics of memory CD8<sup>+</sup> T cells in blood and LTs

Fig. S4. Residency characteristics of CD69<sup>-</sup> and CD69<sup>+</sup> CD8<sup>+</sup> T cells

Fig. S5. RNA-seq, ATAC-seq, and CCR7 analysis of LN T<sub>RM</sub>s

Fig. S6. Imaging analysis and CD103 expression in TDL

Fig. S7. Bulk and HIV-specific analysis and rhesus gating strategy

Fig S8. Index sorting strategy and scRNA-seq analysis

Fig S9. scRNA-seq analysis

Table S1. Cohort characteristics

Table S2. List of significant genes up-/downregulated from RNA-seq

Table S3. List of significant ATAC-seq tracks

Table S4. List of differentially expressed genes between blood and LN HIV-specific CD8<sup>+</sup> T cells from scRNA-seq

## SUPPLEMENTARY MATERIAL AND METHODS

### Human samples

Lymph node (LN) biopsies, peripheral blood, and TDL were collected from individuals classified as HIV<sup>-</sup> (n = 47), HIV<sup>+</sup> chronic and naïve to ART (n = 35), HIV<sup>+</sup> chronic on ART (n = 19), HIV<sup>+</sup> elite controllers (n = 9), and HIV<sup>+</sup> acute/early seroconverters (Fiebig IV–VI; n = 8). Recruitment occurred at four sites: INER-CIENI in Mexico City (HIV<sup>+</sup> ART<sup>+</sup>/ART<sup>-</sup> blood and matched cervical LNs); Case Western Reserve University (HIV<sup>-</sup> mesenteric LNs); University of Pennsylvania (HIV<sup>-</sup> blood, spleen, iliac LNs, tonsils, and TDL; HIV<sup>+</sup> blood, iliac LNs, and TDL); and University of California, San Francisco (HIV<sup>+</sup> elite controllers inguinal LNs). Subject grouping, tissue types, and clinical parameters are summarized in Table S1. All participants enrolled in this study provided written informed consent as per protocols approved by the INER-CIENI Ethics Committee and the Federal Commission for the Protection against Sanitary Risk (COFEPRIS), and the Institutional Review Boards of the University of Pennsylvania and Case Western Reserve University. HIV<sup>-</sup> LN and TDL samples were obtained from following procedures/conditions: tonsils (non-enlarged tonsils from sleep apnea patients), mesenteric LNs (normal structures from patients undergoing abdominal surgery), iliac LNs (normal structures from kidney transplant donors), spleen (splenectomy due to trauma or surgical intervention), and TDL (patients with chylopericardium and chylothorax due to trauma or idiopathic disease).

### Non-human primate samples

Rhesus macaque samples were obtained from two sites: University of Pennsylvania (SIV<sup>-</sup> blood, TDL, and LTs) and Yerkes National Primate Research Center (SIV<sup>+</sup> blood and LTs). All procedures were conducted in accordance with the Animal Welfare Act and other federal statutes and regulations relating to animals.

For studies of matched blood, LTs, and lymph in SIV<sup>-</sup> primates, rhesus macaques of Indian origin (n = 4) were housed in facilities at the University of Pennsylvania Children's Hospital. TDL was first cannulated under anesthesia (see below for more details), and tissues were then removed at necropsy. SIV-infected rhesus macaques were housed and studied at the Yerkes National Primate Research Center as described previously (59).

### **Mouse samples**

C57BL/6J (B6) and B6.SJL-Ptprc<sup>a</sup>Pepc<sup>b</sup>/BoyJ (CD45.1) female mice were purchased from The Jackson Laboratory and National Cancer Institute and housed in specific pathogen-free conditions at the University of Minnesota. Animals were maintained in accordance with regional ethical guidelines, and protocols were approved by the Institutional Review Board (19).

### **Cells and tissues**

Peripheral blood mononuclear cells (PBMCs) were purified from whole blood or leukapheresis products using Ficoll-Hypaque density gradient centrifugation. Lymph node mononuclear cells (LNMCs) and splenocytes were isolated using mechanical disruption. PBMCs and LNMCs were cryopreserved and stored at  $-140^{\circ}\text{C}$  for human and primate studies and stained fresh in all studies on mice.

TDL was accessed as described previously (60). In short, a 25-gauge spinal needle was advanced into an inguinal LN under ultra-sound guidance and an oil-based contrast agent (Ethiodol, Savage Laboratories) was injected under fluoroscopic guidance at a rate of approximately 1 mL per minute. After opacification of the cisterna chyli, access was gained via an anterior transabdominal approach using a 21–22-gauge Chiba needle (Cook Medical Inc.). A V18 control guide wire (Boston Scientific) was then advanced into the thoracic duct and manipulated cephalad. Over the wire, a 60-cm 2.3F Rapid Transit microcatheter (Cordis Corp.) was advanced further into the thoracic duct to aspirate TDL. Aspirated TDL was stored in heparin tubes and centrifuged over a Ficoll-Hypaque density gradient on the same day to remove contrast agents. TDL samples were cryopreserved as described above or used directly in flow cytometry experiments.

### **Conventional flow cytometry (FACS)**

Human cryopreserved PBMCs, LNMCs, and TDL samples were thawed and rested in RPMI-1640 media supplemented with 10% FBS, 1% L-glutamine, and 1% penicillin/streptomycin for at least 1 hour. Cells were then washed with PBS and pre-stained for chemokine receptors and adhesion molecules at  $37^{\circ}\text{C}$  for 10 minutes. After staining with LIVE/DEAD Aqua (Invitrogen) for 10 minutes, an optimized antibody cocktail was added for a further 20 minutes to detect additional surface markers. Cells were then washed with FACS buffer (PBS containing 0.1% sodium azide and 1% BSA), fixed, and permeabilized using a Cytofix/Cytoperm Buffer Kit (BD Biosciences) or a FoxP3 Transcription Factor Buffer Kit (eBioscience). An optimized antibody

cocktail was then added for 1 hour to detect intracellular markers. In the relevant experiments, tetramers were added for 10 minutes at room temperature immediately before pre-stain. Stained cells were fixed in PBS containing 1% paraformaldehyde (Sigma-Aldrich) and stored at 4°C. All samples were acquired within 3 days using an LSRII (BD Biosciences). Data were analyzed with FlowJo software (version 9.8.8 or higher, TreeStar). The gating strategies are depicted in the relevant figures.

For sorting experiments, thawed and rested PBMCs and/or LNMCs or fresh splenocytes were stained in 15-mL conical tubes following the procedure described above with higher concentrations of antibodies (i.e. not diluted 1:50 in FACS buffer). Cells were then washed with PBS and suspended in RPMI-1640 media without phenol red. All sorting experiments were carried out using a FACSAriaII (BD Biosciences).

Rhesus macaque cells were stained as previously described (59). Mamu A\*01 tetramers were also added for 10 minutes at immediately before pre-stain.

Mouse splenocytes were stained as previously described (19).

### **Mass cytometry (CyTOF)**

Cryopreserved cells were thawed in 0.025 U/mL benzonase (Sigma-Aldrich), washed, incubated in 1  $\mu$ M cisplatin (Fluidigm) for 5 minutes, and stained with an optimized surface antibody cocktail for 30 minutes at room temperature. For intracellular staining, cells were fixed and permeabilized using a FoxP3 Transcription Factor Buffer Kit (eBioscience), and incubated with an optimized intracellular antibody cocktail for 1 hour at room temperature. Cells were then washed three times with PBS, resuspended in 2% paraformaldehyde (Electron Microscopy Sciences) in the presence of 125 nM iridium intercalator (Fluidigm), and incubated overnight at 4°C. After three further washes, including a final wash in distilled water, cells were resuspended in PBS containing bead standards (Fluidigm) before acquisition using a CyTOF 2 (Fluidigm).

CyTOF FCS files were normalized using bead standards and the Matlab-based Nolan laboratory normalizer (61). Single unstimulated Iridium<sup>+</sup> CD3<sup>+</sup> CD19<sup>-</sup> TCR $\alpha\beta$ <sup>+</sup> CD8<sup>+</sup> T cells were discriminated from doublets and beads using FlowJo (TreeStar). Dimensionality reduction and cell clustering were performed in R using the “cytofkit” package of the tSNE and Phenograph algorithms. The analysis used a maximum of 1635 cells from 17 individuals, giving a total of 27,576 cells.

## Flow antibodies

The following antibodies were used for human FACS experiments:  $\alpha$ -CCR7 APC-Cy7 (clone G043H7, BioLegend),  $\alpha$ -CD49a PE-Cy7 (clone TS2/7, BioLegend),  $\alpha$ -CXCR6 BV421 (clone K041E5, BioLegend),  $\alpha$ -CX3CR1 PE (clone 2A9-1, BioLegend),  $\alpha$ -CCR5 BV650 (clone 3A9, BD Biosciences),  $\alpha$ -CXCR3 BV711 (clone G025H7, BioLegend),  $\alpha$ -CD14 BV510 (clone M5E2, BioLegend),  $\alpha$ -CD19 BV510 (clone HIB19, BioLegend),  $\alpha$ -CD3 AF700 or APC-R700 (clone UCHT1, BD Biosciences),  $\alpha$ -CD3 (clone UCHT1, BioLegend),  $\alpha$ -CD4 PeCy5.5 (clone S3.5, Invitrogen),  $\alpha$ -CD8a BV570, BV605, BV711, or BV785 (clone RPA-T8, BioLegend),  $\alpha$ -CD27 AF700, BV650 or BV785 (clone O323, BioLegend),  $\alpha$ -CD45RO BV650 or PE-CF594 (clone UCHL1, BD Biosciences),  $\alpha$ -CD45RA BV650, PE or PE-CF594 (clone HI100, BD Biosciences),  $\alpha$ -CD69 BV421 or PE-Cy5 (clone FN50, BioLegend),  $\alpha$ -CD69 PE-Cy5 (clone TP1.55.3, Beckman Coulter),  $\alpha$ -CD103 BV605 or PE-Cy7 (clone Ber-ACT8, BioLegend),  $\alpha$ -CD52 FITC (clone HI186, BioLegend),  $\alpha$ -CXCR5 AF488 or AF647 (clone RF8B2, BD Biosciences),  $\alpha$ -PD-1 BV421 or PE (clone EH12.2H7, BioLegend),  $\alpha$ -HLA-DR BV605 or BV650 (clone G46-6, BD Biosciences),  $\alpha$ -CD38 APC or BV711 (clone HIT2, BioLegend),  $\alpha$ -CD25 PE (clone M-A251, BD Biosciences),  $\alpha$ -4-1BB BV421 (clone 4B4-1, BioLegend),  $\alpha$ -OX40 APC (clone ACT35, BD Biosciences),  $\alpha$ -ICOS PE-EF610 (clone ISA-3, eBioscience),  $\alpha$ -PD-L1 BV785 (clone 10F.9G2, BioLegend),  $\alpha$ -CD95 BB515 (clone DX2, BD Biosciences),  $\alpha$ -IFN $\gamma$  Alexa700 (clone B27, Invitrogen),  $\alpha$ -TNF PE-Cy7 (clone MAb11, BD Biosciences),  $\alpha$ -perforin BV421 or PE-Cy7 (clone B-D48, BioLegend),  $\alpha$ -perforin PE-Cy7 (clone dG9, eBioscience),  $\alpha$ -granzyme B Alexa700 (clone GB11, BD Biosciences),  $\alpha$ -T-bet PE (clone 4B10, eBioscience),  $\alpha$ -T-bet PE-Dazzle 594 (clone 4B10, BioLegend),  $\alpha$ -Eomes AF647 (clone WD1928, eBioscience), and  $\alpha$ -Ki67 FITC (clone B56, BD Biosciences). LIVE/DEAD Aqua (Invitrogen) was used to discriminate dead cells.

The following antibodies were used for mouse FACS experiments:  $\alpha$ -CD69 (clone H1.2F3, eBioscience)  $\alpha$ -CD62L (clone MEL-14, Biolegend)  $\alpha$ -CD8a (clone 53-6.7, eBioscience),  $\alpha$ -CD3 (clone 145-2C11, Biolegend),  $\alpha$ -Thy1.1 (clone HIS51, eBioscience),  $\alpha$ -CD44 (clone IM7, eBioscience),  $\alpha$ -CD45.1 (clone A20, eBioscience).

The following antibodies were used for non-human primate FACS experiments:  $\alpha$ -CD14 BV650 (clone M5E2, BioLegend),  $\alpha$ -CD16 BV650 (clone 3G8, BioLegend),  $\alpha$ -

CD20 BV650 (clone 2H7, BioLegend),  $\alpha$ -CD3 APC-Cy7 (clone SP34-2, BD Biosciences),  $\alpha$ -CD4 PE-Cy5.5 (clone S3.5, Invitrogen),  $\alpha$ -CD8a BV570 (clone RPA-T8, BioLegend),  $\alpha$ -CD28 ECD (clone CD28.2, Beckman Coulter),  $\alpha$ -CD69 BV605 or PE (clone FN50, BioLegend),  $\alpha$ -CD95 PE-Cy5 (clone DX2, BD Biosciences), and  $\alpha$ -Ki-67 BV786 (clone B56, BD Biosciences). LIVE/DEAD Aqua (Invitrogen) was used to discriminate dead cells.

For mass cytometry (CyTOF), purified antibodies were conjugated to isotope-loaded polymers using an X8 Maxpar Kit (Fluidigm) and diluted to 0.2 mg/mL in antibody stabilization buffer (Candor bioscience). The following antibodies were used for human CyTOF experiments:  $\alpha$ -CD57  $^{113}\text{In}$  (clone HCD57, BioLegend),  $\alpha$ -CD3  $^{141}\text{Pr}$  (clone UCTH1, BD Biosciences),  $\alpha$ -CD5  $^{142}\text{Nd}$  (clone UCTH2, BioLegend),  $\alpha$ -CD8  $^{143}\text{Nd}$  (clone SK1, BioLegend),  $\alpha$ -CD4  $^{144}\text{Nd}$  (clone SK3, BioLegend),  $\alpha$ -CD19  $^{145}\text{Nd}$  (clone HIB19, BioLegend),  $\alpha$ -IgD  $^{146}\text{Nd}$  (clone IA6-2, BioLegend),  $\alpha$ -IFN $\gamma$   $^{147}\text{Sm}$  (clone 4S.B3, eBioscience),  $\alpha$ -CCR6  $^{148}\text{Nd}$  (clone G034E3, BioLegend),  $\alpha$ -CD14  $^{149}\text{Sm}$  (clone M5E2, BioLegend),  $\alpha$ -CD69  $^{150}\text{Nd}$  (clone FN50, BioLegend),  $\alpha$ -Granzyme A  $^{151}\text{Eu}$  (clone CB9, BioLegend),  $\alpha$ -TNF  $^{152}\text{Sm}$  (clone MAb11, BioLegend),  $\alpha$ -CD45RO  $^{153}\text{Eu}$  (clone UCHL1, BioLegend),  $\alpha$ -CD27  $^{154}\text{Sm}$  (clone LG.7F9, eBioscience),  $\alpha$ -TCR $\alpha\beta$   $^{155}\text{Gd}$  (clone T10B9.1A-31, BD Biosciences),  $\alpha$ -CCR5  $^{156}\text{Gd}$  (clone J418F1, BioLegend),  $\alpha$ -Ki-67  $^{157}\text{Gd}$  (clone B56, BD Biosciences),  $\alpha$ -Ki-67  $^{157}\text{Gd}$  (clone B56, BD Biosciences),  $\alpha$ -BLYS  $^{158}\text{Gd}$  (clone 1D6, BioLegend), ),  $\alpha$ -BCL6  $^{159}\text{Tb}$  (clone K112-91, BD Biosciences),  $\alpha$ -IL-4  $^{160}\text{Gd}$  (clone 8D4-8, BD Biosciences),  $\alpha$ -CD25  $^{161}\text{Dy}$  (clone M-A251, BD Biosciences),  $\alpha$ -Eomes  $^{162}\text{Dy}$  (clone wd1928, eBioscience),  $\alpha$ -ICOS  $^{163}\text{Dy}$  (clone c398-4A, BioLegend),  $\alpha$ -IL-5  $^{164}\text{Dy}$  (clone TRFK5, BioLegend),  $\alpha$ -FOXP3  $^{165}\text{Ho}$  (clone PCH101, eBioscience),  $\alpha$ -CD95  $^{166}\text{Er}$  (clone DX2, BioLegend),  $\alpha$ -CD45RA  $^{167}\text{Er}$  (clone H100, eBioscience),  $\alpha$ -CCR7  $^{168}\text{Er}$  (clone G043H7, BioLegend),  $\alpha$ -CXCR5  $^{169}\text{Tm}$  (clone RF8B2, BD Biosciences),  $\alpha$ -T-bet  $^{170}\text{Er}$  (clone 4B10, BioLegend),  $\alpha$ -PD-1  $^{171}\text{Yb}$  (clone EH12.2H7, BioLegend),  $\alpha$ -IL-21  $^{172}\text{Yb}$  (clone 3A3-N2, BioLegend),  $\alpha$ -IL-2  $^{173}\text{Yb}$  (clone MQ1-17H12, eBioscience),  $\alpha$ -CD24  $^{174}\text{Yb}$  (clone ML5, BioLegend),  $\alpha$ -CXCR3  $^{175}\text{Lu}$  (clone G025H7, BioLegend), and  $\alpha$ -CD38  $^{176}\text{Yb}$  (clone HIT2, BioLegend).

### **Tetramers**

MHC class I tetramers conjugated to PE or BV421 were used to detect CD8<sup>+</sup> T cells specific for HIV-SLYNTVATL (SL9)/HLA-A\*0201, HIV-ILKEPVHGV (IV9)/HLA-

A\*0201, HIV-FLGKIWPSHK (FK10)/HLA-A\*0201, HIV-TLNAWVKVV (TV9)/HLA-A\*0201, HIV-NLVPMVATV (NV9)/HLA-A\*0201, HIV-RYPLTFGW (RW8)/HLA-A\*2402, HIV-KYKLVKHW (KW9)/HLA-A\*2402, HIV-GPGHKARVL (GL9)/HLA-B\*0702, HIV-HPRVSSEVHI (HI10)/HLA-B\*0702, HIV-SPAIFQSSF (SM9)/HLA-B\*0702, HIV-KRWIILGLNK (KK10)/HLA-B\*2705, HIV-KAFSPEVIPMF (KF11)/HLA-B\*5701, HIV-TSTLQEQIGW (TW10)/HLA-B\*5701, HIV-ISPRTLNAW (ISW9)/B\*5701, and HIV-QASQEVKNW (QW9)/HLA-B\*5701. All fluorochrome-conjugated peptide-HLA-monomers were received from the NIH Tetramer Core Facility at Emory University or as gifts from Dr. David Price. All monomers were produced and tetramerized as previously described (58).

SIV-TTPESANL (Tat-TL8)/Mamu A\*01 APC conjugated tetramers and SIV-CTPYDINQM (Gag-CM9)/Mamu A\*01 monomers were supplied by the NIH Tetramer Core Facility at Emory University. Gag-CM9 Mamu A\*01-BV421 tetramers were prepared in our laboratory as previously described (58).

### **Multiparameter confocal imaging**

Confocal imaging was performed with fixed OCT embedded lymph node sections ~10um in thickness. Briefly, after allowing the tissue sections to dry for 1h/RT, antigen retrieval was performed at 90°C for 20 minutes using Borg RTU (Biocare Medical). Tissue sections were then blocked for 1 hour at room temperature and stained with the following primary and conjugated antibodies: anti-CD69 (mouse IgG1, clone 8B6), anti-CD8 (mouse IgG2b, clone 4B11), CD103 (rabbit IgG, clone EPR4166(2)), anti-PD-1 Alexa Fluor 488 (goat polyclonal, R&D) and anti-CD20 efluor615 (clone L26). The nuclear marker JOJO-1 (Life Technologies) was also used. The primary antibodies were incubated first (overnight at 4°C), followed by staining with the appropriate secondary antibodies; goat anti-mouse IgG1 Alexa Fluor 647, goat anti-mouse IgG2b Alexa Fluor 546 and donkey anti-rabbit IgG BV421. Conjugated antibody staining was performed for 2 hours at room temperature, after which sections were stained with Jo-Pro-1 for nucleus identification. Images were acquired (512- x 512-pixel density) using a 40x objective (NA 1.3) on a NIKON C2si confocal microscope running NIS-elements AR. Fluorophore spectral spillover was corrected by acquiring single stained tissue controls and creation of an emission spectrum database which was subsequently utilized by the program to separate the emission of different fluorophores (spectral unmixing, NIKON).

### **HistoFlow and imaging analysis**

Post-acquisition analysis was performed using the Imaris software (Bitplane, version 8.3.1). Histocytometry was performed as previously described (39). In brief, imaging objects were segmented based on their nuclear staining signal and average voxel intensities for all channels were extrapolated in Imaris after iso-surface generation. Data were then exported to Microsoft Excel, concatenated into a single comma separated value (csv) files and imported into FlowJo version 10 for further analysis.

### **Activation experiments**

PBMCs were thawed, rested overnight and stimulated with anti-CD3 (BioRad) and anti-CD28/CD49d (BD Biosciences). After 3-days of stimulation, cells were stained for multiple activation markers and subsequently used as a positive control in experiments comparing the activation status of LT CD69<sup>-</sup> and CD69<sup>+</sup> cells.

### **Kinetics of CD69 expression**

Memory CD69<sup>-</sup> and CD69<sup>+</sup> CD8<sup>+</sup> T cells were isolated from LTs using a FACSArialI (BD Biosciences). Cells were then cultured for 9 days in 96-well plates in the presence or absence of 10 ng/mL rhIL-7 (R&D Systems).

### **CXCL19/21 stimulations**

Memory CD69<sup>-</sup> and CD69<sup>+</sup> CD8<sup>+</sup> T cells were isolated from LTs using a FACSArialI (BD Biosciences). Cells were then cultured for up to 9 days in 96-well plates in the presence or absence of 100 ng/mL rhCCL19 and 100 ng/mL rhCCL21 (R&D Systems).

### **Adoptive transfers, infections and microarray in mice**

P14 immune chimeras were generated by transferring  $5 \times 10^4$  P14 (LCMV gp33-41specific) CD8<sup>+</sup> T cells into naive C57BL/6J mice. Next day, mice were infected with  $2 \times 10^5$  plaque-forming units (PFU) LCMV Armstrong via intraperitoneal (i.p.) injection. Murine spleen CD8<sup>+</sup> Thy1.1<sup>+</sup> P14 SLO T<sub>RM</sub>s (CD62L<sup>-</sup>CD69<sup>+</sup>) and T<sub>CM</sub>s (CD62L<sup>hi</sup>CD69<sup>-</sup>) were sorted similarly as described above. Sorted cell populations were homogenized using QIAshredder columns (Qiagen) and RNA was extracted with the RNeasy kit (Qiagen). RNA quality was assessed using a 2100 Bioanalyzer (Agilent). Total RNA samples were processed using the GeneChip® 3' IVT Pico Kit (Affymetrix). Samples were hybridized and loaded onto Affymetrix Genechip Mouse Genome 430 2.0 arrays.

**Microarray analysis.** All Affymetrix raw data passed the data quality control steps. The probe data set were next pre-processed and normalized with RMA (Robust



Multiarray Average) from the R package, “affy”. Prior to performing differential expression analysis, genes with average expression across all samples less than the background expression level (expression < 3.5) were filtered out. Differential gene expression (z-score) analysis was performed using the limma package in R.

### **RNA sequencing (RNA-seq)**

Memory CD69<sup>-</sup> and CD69<sup>+</sup> CD8<sup>+</sup> T cells from MesLNs (250 cells per subset) were sorted using a FACSAriaII (BD Biosciences) directly into lysis buffer provided with the SMART-Seq v4 Ultra Low Input RNA Kit (Takara) and snap frozen. RNA-seq libraries were prepared using the SMART-Seq v4 Ultra Low Input RNA Kit (Takara) according to manufacturer’s protocols. Briefly, 3’ SMART-Seq CDS (oligo-dt) Primers were hybridized to the poly(A) tail of all the mRNA and reverse transcribed with the SMARTScribe RT enzyme. cDNA was pre-amplified using SeqAmp DNA polymerase and frozen. Amplified material was purified using Agencourt AMPure XP beads (Beckman) and cDNA quantity was assessed on a Qubit 3.0 (Thermo) and fragment size was evaluated on a 2100 BioAnalyzer (Agilent). The PCR products were next indexed using the Nextera XT DNA Library Prep Kit (Illumina) according to manufacturer’s protocol. Briefly, products were tagmented using the Amplicon tagment mix, containing Tn5 transposase, and indexed using Nextera index 1 (i7) and index 2 (i5) primers. The libraries were again cleaned-up with Agencourt AMPure XP beads, pooled, quantified and sequenced across 75 base pairs (bp) using a paired-end strategy with a 150-cycle high output flow cell on a NextSeq 550 (Illumina). Three biological replicates were sequenced per experiment. Fastq files from three sequencing runs were concatenated and aligned using STAR 2.5.2a and hg38 to generate a final unique paired mapped read depth ranging from 8 million to 13.6 million reads per sample. The aligned files were normalized using Deseq2.

### **Differentially expressed genes**

Differentially expressed genes on normalized RNA-seq counts between bulk LN CD69<sup>-</sup> and CD69<sup>+</sup> CD8<sup>+</sup> T cells were assessed using a t-test (P < 0.05) with the R limma package (v3.28.21). Genes of interest were then submitted to ingenuity pathway analysis (IPA, Qiagen Bioinformatics) to identify overrepresented pathways and upstream predictors. Differentially expressed genes with a larger than 2-fold difference between LN CD69<sup>-</sup> and CD69<sup>+</sup> CD8<sup>+</sup> T cells were visualized using the Pheatmap package in R (v. 1.0.8).

### **Gene set enrichment analysis (GSEA)**

Normalized bulk and single cell RNA-seq counts from sorted LN CD69<sup>-</sup> and CD69<sup>+</sup> CD8<sup>+</sup> T cells were subjected to GSEA using Broad Institute software (<http://www.broadinstitute.org/gsea/index.jsp>). Gene signatures from bulk LN CD69<sup>-</sup> and CD69<sup>+</sup> CD8<sup>+</sup> T cells were compared with gene signatures indicative of lung T<sub>RM</sub> programs (37).

### **ATAC sequencing (ATAC-seq)**

ATAC-seq was performed as described previously with minor modifications (62). Memory CD69<sup>-</sup> and CD69<sup>+</sup> CD8<sup>+</sup> T cells from hepLNs (30,000–50,000 cells per subset) were sorted using a FACSAriaII (BD Biosciences) directly into R10 media. Cells were pelleted, washed with PBS, and treated with lysis buffer (10 mM Tris-HCl pH 7.4, 10 mM NaCl, 3 mM MgCl<sub>2</sub>, 0.1% IGEPAL CA-630). Nuclear pellets were resuspended in a transposition reaction with Tn5 transposase (Illumina) for 30 minutes to tag and fragment accessible chromatin, and the reaction was incubated in a water bath at 37°C. Tagmented DNA was purified using a MinElute Reaction Cleanup Kit (Qiagen) and amplified using PCR. Libraries were then purified using a QIAQuick PCR Purification Kit (Qiagen) and paired-end sequenced (38bp + 37bp) on a NextSeq 550 (Illumina). Two biological replicates per sorted memory CD8<sup>+</sup> T cell population was sequenced from n=1 hepatic LN.

ATAC-seq analysis for each cell type was performed in duplicates. Macs2 with '*-p 1e-7 --nolambda --nomodel*' was applied on each ATAC-seq replicate separately to identify accessible chromatin. Peaks were subsequently merged using BEDTools and ATAC-seq read counts were calculated in the merged peaks for every replicate. The resulting count table was used to identify differentially enriched regions in ATAC-seq signal between CD69<sup>+</sup> and CD69<sup>-</sup> cells with DESeq2 after applying fold change > 2; P < 0.05. De novo motif analysis was performed using Homer to assess the enrichment of cell-specific transcription factors. In each case, genomic regions shared between two cell types were used as background control. T<sub>RM</sub>-specific open chromatin regions were also linked to genes based on proximity (<10kbp) in order to enable GO term enrichment analysis using the GSEA website. Visualization of ATAC-seq tracks (peaks) was conducted using Integrative genomics viewer (igv) version 2.3.93

### **Single-cell RNA sequencing**

Single-cell clonotypic analysis was derived from a previously published method (63). In brief, single HIV-tetramer<sup>+</sup> cells were index sorted using a FACSAria II (BD

Biosciences) directly into 96-well microtiter plates containing lysis buffer. In total, 552 cells were sorted, and full genome was sequenced from 221 cells. Cellular nucleic acids were recovered by processing the lysates with an RNEasy Plus Micro Kit (Qiagen) and then binding to RNAClean (SPRI) beads (Beckman Coulter). ERCC RNA control (Ambion) was diluted 1 in  $10^7$  from stock, and 10% by volume was added to the RNAClean beads prior to purification. mRNA was then reverse transcribed from an anchored oligo-dT primer that includes a universal priming site at the 5' end. RT reactions also included a template-switch oligonucleotide to allow the incorporation of the universal priming site at cDNA 3' ends. Whole transcriptome cDNA was then amplified by PCR for 22–24 cycles using universal priming sites primers and Kapa HiFi Hot Start ReadyMix. After post-PCR clean-up, amplified whole transcriptome cDNA was incorporated into barcoded Illumina Nextera libraries and sequenced to a depth of about 2 million 150bp paired-end reads/cell on a HiSeq 4000 (Illumina).

### **Single-cell RNA-seq analysis**

Data were initially filtered for quality. Paired-end sequencing reads were then trimmed to remove adaptor sequences and low-quality basecalls using the utility Trimmomatic. Reads were subsequently aligned using Bowtie against a genomic repeat element database derived from RepeatMasker software to quantify and remove transcript reads considered to be irrelevant for the analysis in hand (rRNA, rRNA, LINEs, SINEs, etc). The remaining reads were aligned against the most recent human genome build, hg38, using the splice-site aware aligner, STAR. As a bioinformatic measure of library quality, the total frequency of reads that could be mapped to the transcriptome was determined, and outliers were excluded from further analysis. Transcripts were then quantified and normalized using the bioinformatics package, Cufflinks. In our experience, a small number of libraries display low complexity and lack expression of highly expressed housekeeping genes. In most systems, a set of housekeeping genes should be expressed in every cell. We therefore use qPCR to identify viable samples expressing two distinct housekeeping genes. Samples with low or no expression of these genes are removed from Nextera library construction. To further ensure exclusion of data from single cells for which library construction was unsuccessful, we determined diversity (Shannon entropy and count of detected genes) using the R package, Vegan, and discarded outliers.

For differential gene expression analysis of CD69<sup>-</sup> and CD69<sup>+</sup> HIV-specific CD8<sup>+</sup> T cells, raw counts were normalized using the R package, SCnorm. The normalized data

was then transformed using z-transformation and analyzed for differential expression using the R package, ROTS.

### **Analysis of TCR sequences**

For clonotype analysis of CD69<sup>-</sup> and CD69<sup>+</sup> HIV-specific CD8<sup>+</sup> T cells, the software package, MiXCR, was used to assemble and annotate TCR sequences from the pool of reads which had not aligned to the reference genome in the previous step. After assembly, low quality and low frequency TCR chains were removed. Clonotypes were then built for each cell using the refined chain information. An average of 55 (range 23–143) TCRBV sequences were analyzed per patient.

### **General statistical analysis**

Mann-Whitney or unpaired t-tests were used to compare differences between unmatched groups, and Wilcoxon matched-pairs single rank or paired t-tests were used to compare differences between matched samples. Spearman or Pearson tests were used for correlation analyses. Non-parametric or parametric tests were conducted based on normal distribution of the data points (Shapiro-Wilk normality test). All analyses were performed using R studio or Prism v7.0 (GraphPad). Cell ACCENSE (Automatic Classification of Cellular Expression by Nonlinear Stochastic Embedding) analyses were conducted to visualize phenotypic relationships within multivariate data sets (<http://www.cellaccense.com>).

## SUPPLEMENTARY FIGURES

Figure S1

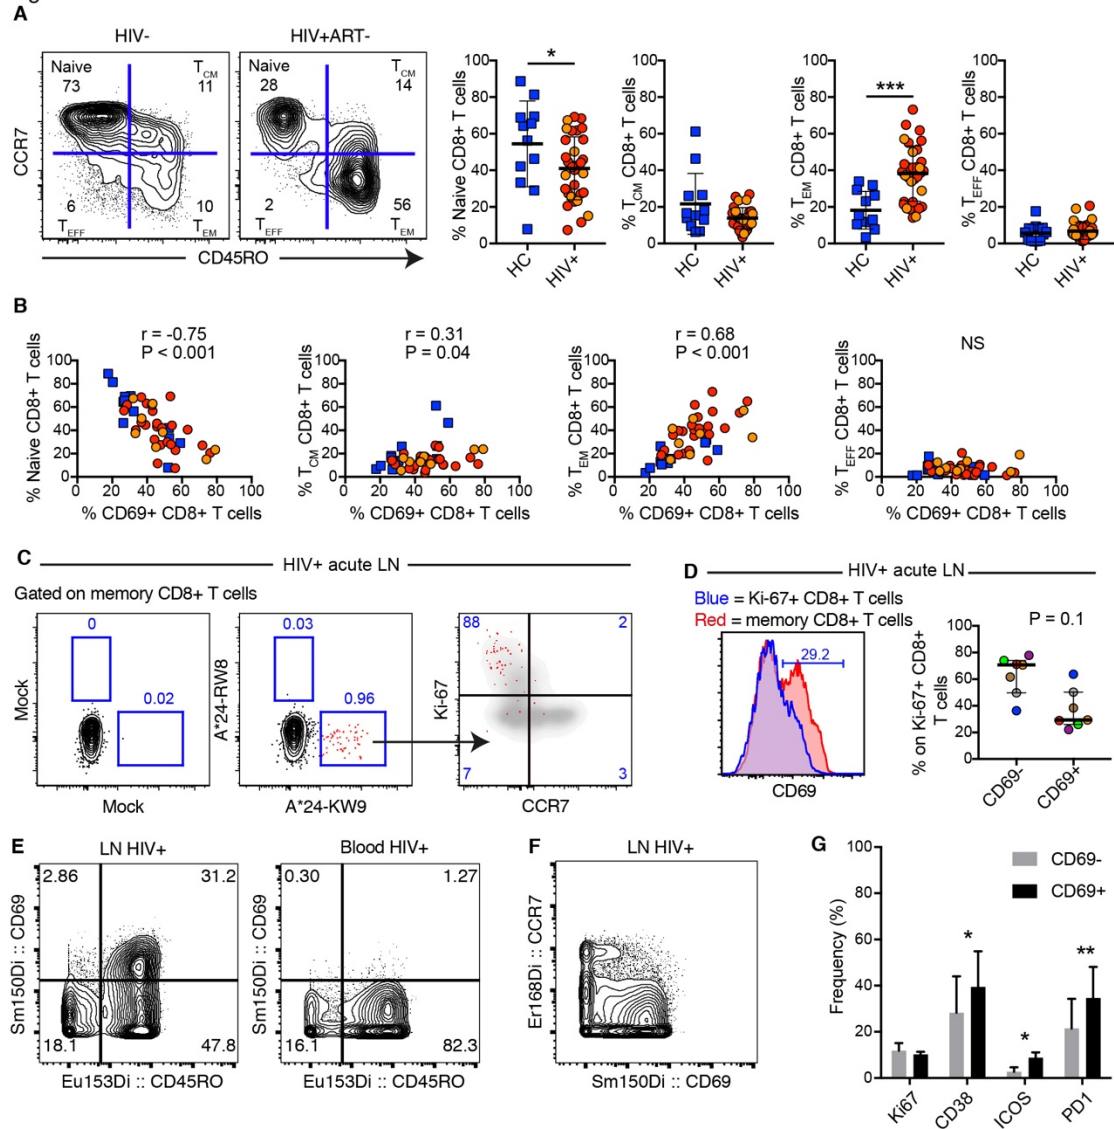

**Fig. S1. Maturation of and cycling of LN CD8<sup>+</sup> T cells**

**(A)** Frequency of LN naïve (CCR7<sup>+</sup> CD45RO<sup>-</sup>/CD45RA<sup>+</sup>), T<sub>CM</sub> (CCR7<sup>+</sup> CD45RO<sup>+</sup>/CD45RA<sup>-</sup>), T<sub>EM</sub> (CCR7<sup>-</sup> CD45RO<sup>+</sup>/CD45RA<sup>-</sup>), and T<sub>EFF</sub> (CCR7<sup>-</sup> CD45RO<sup>-</sup>/CD45RA<sup>+</sup>) of total CD8<sup>+</sup> T cells in HIV<sup>-</sup> and HIV<sup>+</sup> subjects. Blue: HIV<sup>-</sup> subjects; red: HIV<sup>+</sup> ART<sup>-</sup> subjects; orange: HIV<sup>+</sup> ART<sup>+</sup> subjects. **(B)** Correlation between LN naïve, T<sub>CM</sub>, T<sub>EM</sub>, and T<sub>EFF</sub> frequencies and CD69 expression on total CD8<sup>+</sup> T cells. Blue: HIV<sup>-</sup> subjects; red: HIV<sup>+</sup> ART<sup>-</sup> subjects; orange: HIV<sup>+</sup> ART<sup>+</sup> subjects. **(C)** Representative flow cytometry plots showing background (mock) and an HIV-tetramer<sup>+</sup> CD8<sup>+</sup> T cell response in an acutely HIV-infected LN. **(D)** Frequency of Ki-67<sup>+</sup> CD69<sup>-</sup> and CD69<sup>+</sup> CD8<sup>+</sup> T cells. **(E)** CYTOF plots showing the expression intensity of CD69 and CD45RO on total CD8<sup>+</sup> T cells between LN and blood. **(F)** CYTOF plot (gated on total CD8<sup>+</sup> T

cells) showing the expression intensity of CD69 and CCR7. **(G)** The frequency of several activation markers on/in CD69- and CD69+ CD45RO+ CD8+ T cells in HIV-infected subjects (n = 14) using CYTOF. \* $P < 0.05$ ; \*\* $P < 0.01$ ; \*\*\* $P < 0.001$ .

Related to Fig. 1

Figure S2

**A** Fluorescence flow cytometry gating of naive and memory CD8+ T cells

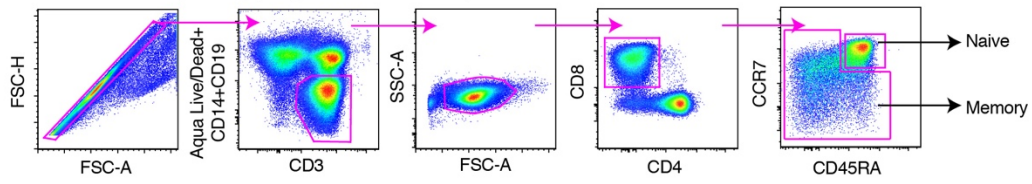

**B**

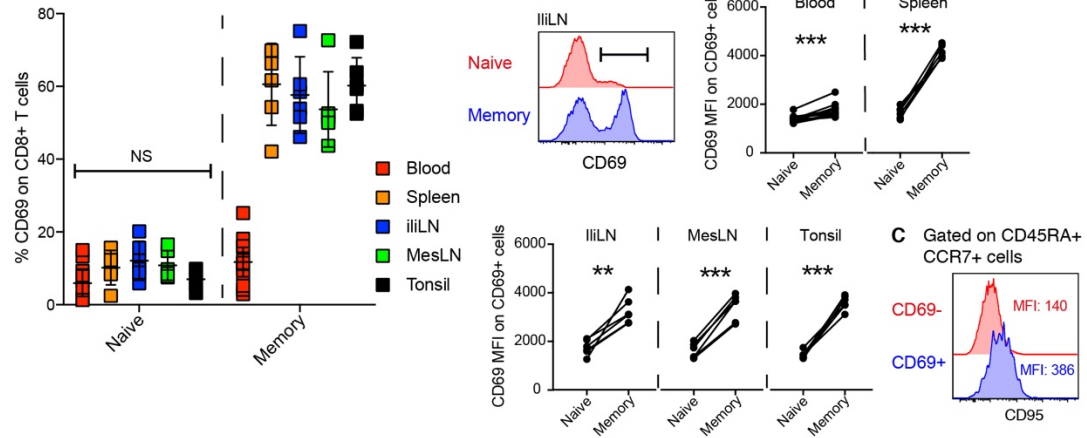

**C** Gated on CD45RA+ CCR7+ cells

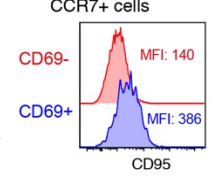

**D**

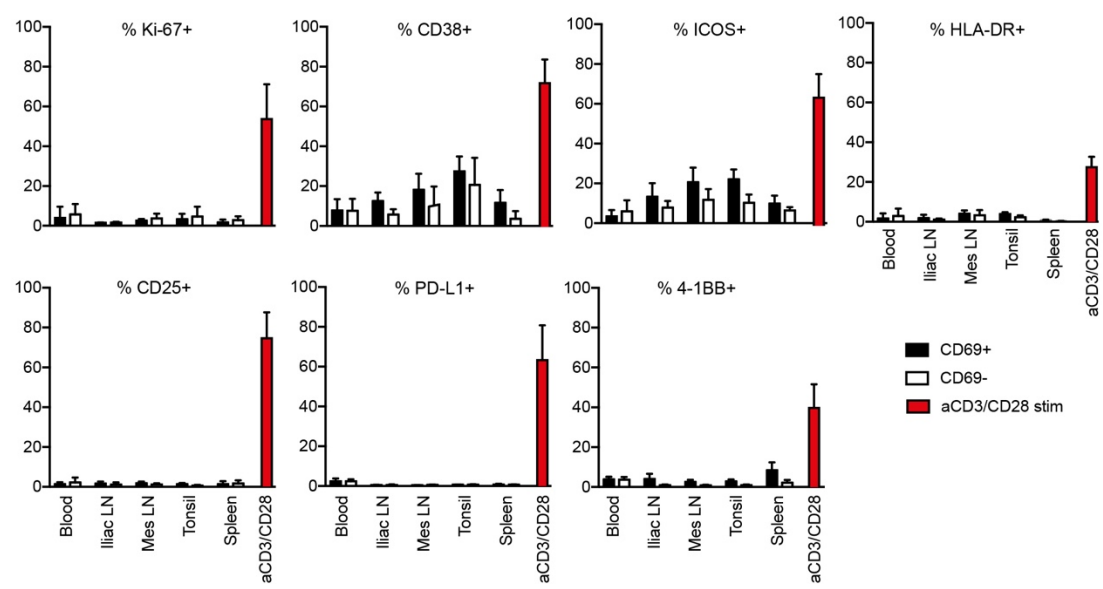

**E**

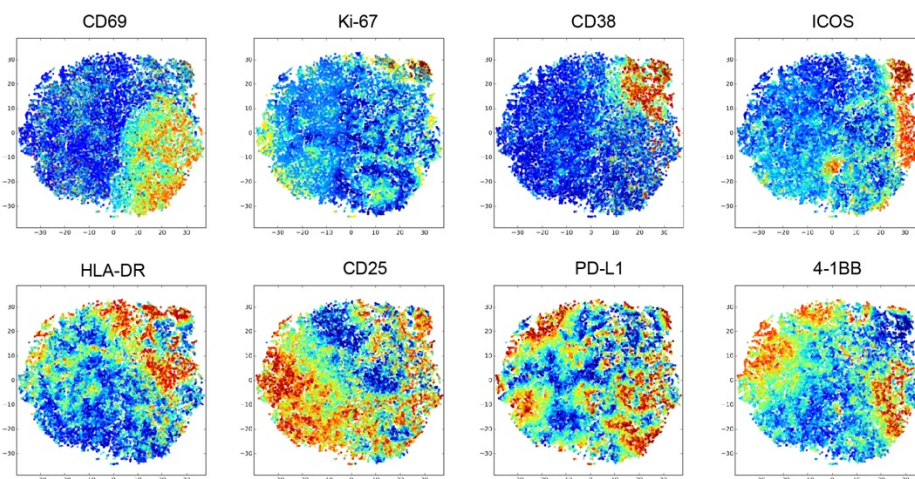

**Fig. S2. CD69 expression on naïve CD8<sup>+</sup> T cells and immune activation profile of CD69<sup>-</sup> and CD69<sup>+</sup> CD8<sup>+</sup> T cells in LTs**

**(A)** Gating strategy to detect naïve and memory CD8<sup>+</sup> T cells in blood and LTs for all human analysis. **(B)** CD69 frequency (left) and MFI (right) on naïve and memory CD8<sup>+</sup> T cells from different sites. **(C)** CD95 MFI on naïve-like (CD45RA+CCR7+) CD69<sup>-</sup> (red) and CD69<sup>+</sup> (blue) cells. **(D)** Frequency of different immune activation markers on CD69<sup>-</sup> (white) and CD69<sup>+</sup> (black) CD8<sup>+</sup> T cells in blood and LTs; all data points are derived from HIV<sup>-</sup> subjects in Fig. 2A. Anti-CD3-CD28 stimulated blood memory CD8<sup>+</sup> T cells (red) were used as a positive control (n = 4). Median and IQR are shown for all bar plots. **(E)** Expression intensity of CD69 and multiple activation markers on CD8<sup>+</sup> T cells. tSNE plots were derived using 30000 randomly selected CD8<sup>+</sup> T cells (n = 5 subjects), merged from blood, iliac LN, mesenteric LN, spleen and tonsils. \*\**P* < 0.01; \*\*\**P* < 0.001.

Related to Fig. 2



Figure S3

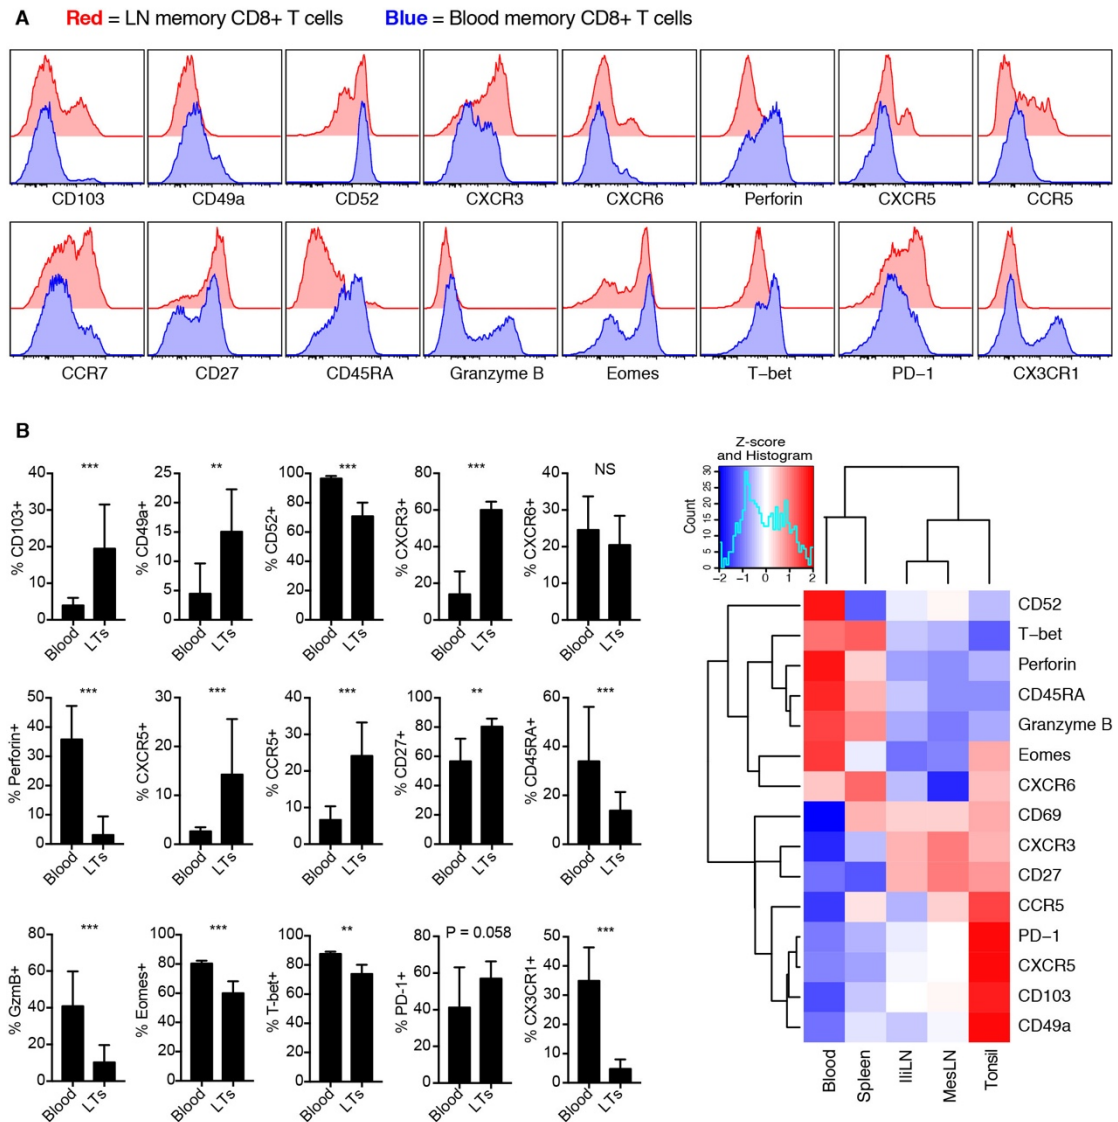

**Fig. S3. Phenotypic characteristics of memory CD8<sup>+</sup> T cells in blood and LTs**  
**(A)** Representative histograms of all assessed markers between memory CD8<sup>+</sup> T cells from LN (red) and blood (blue). **(B)** Frequency of multiple markers linked to residency, trafficking, effector function, and transcriptional regulation in blood and LTs on memory CD8<sup>+</sup> T cells. Data points for LTs are derived from spleen, IliLN, MesLN, and tonsils merged together from Fig. 2A. Median and IQR are shown for all bar plots. The heatmap (right) shows hierarchical clustering of blood and different LTs based on the assessed markers. \* $P < 0.05$ ; \*\* $P < 0.01$ ; \*\*\* $P < 0.001$ .

Related to Fig. 2

Figure S4

Gated on memory CD8+ T cells

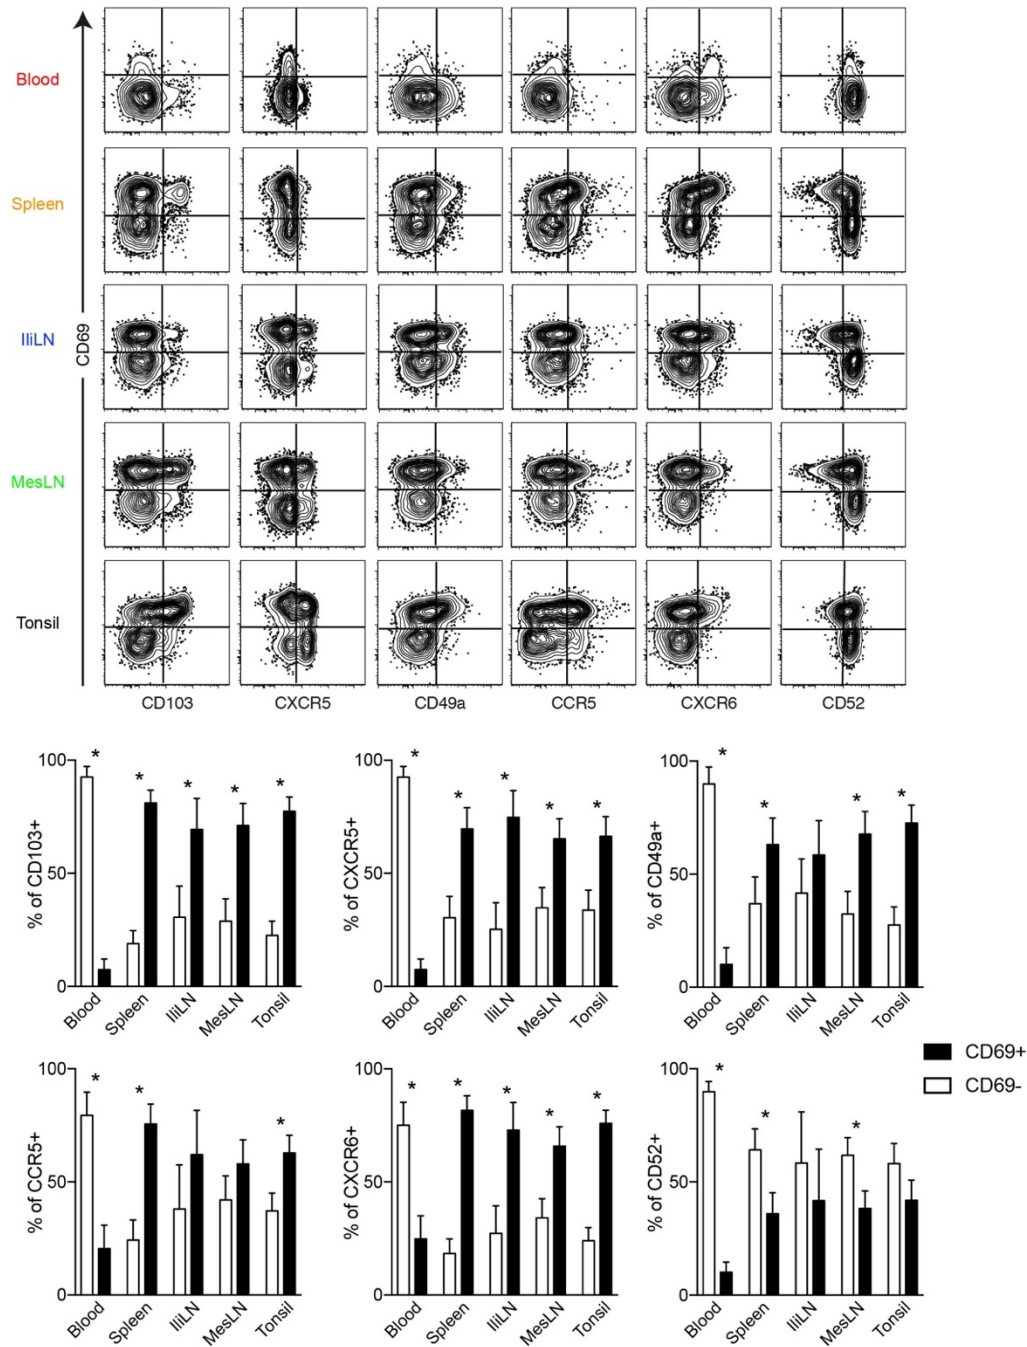

Fig.

#### S4. Residency characteristics of CD69<sup>-</sup> and CD69<sup>+</sup> CD8<sup>+</sup> T cells

Representative flow cytometry plots showing co-expression patterns between CD69 and multiple markers linked to NLT T<sub>RM</sub>s on memory CD8<sup>+</sup> T cells. The bar plots show all residency markers on gated CD69<sup>-</sup> (white) and CD69<sup>+</sup> (black) memory CD8<sup>+</sup> T cells. \*P < 0.05.

Related to Fig. 2

Figure S5

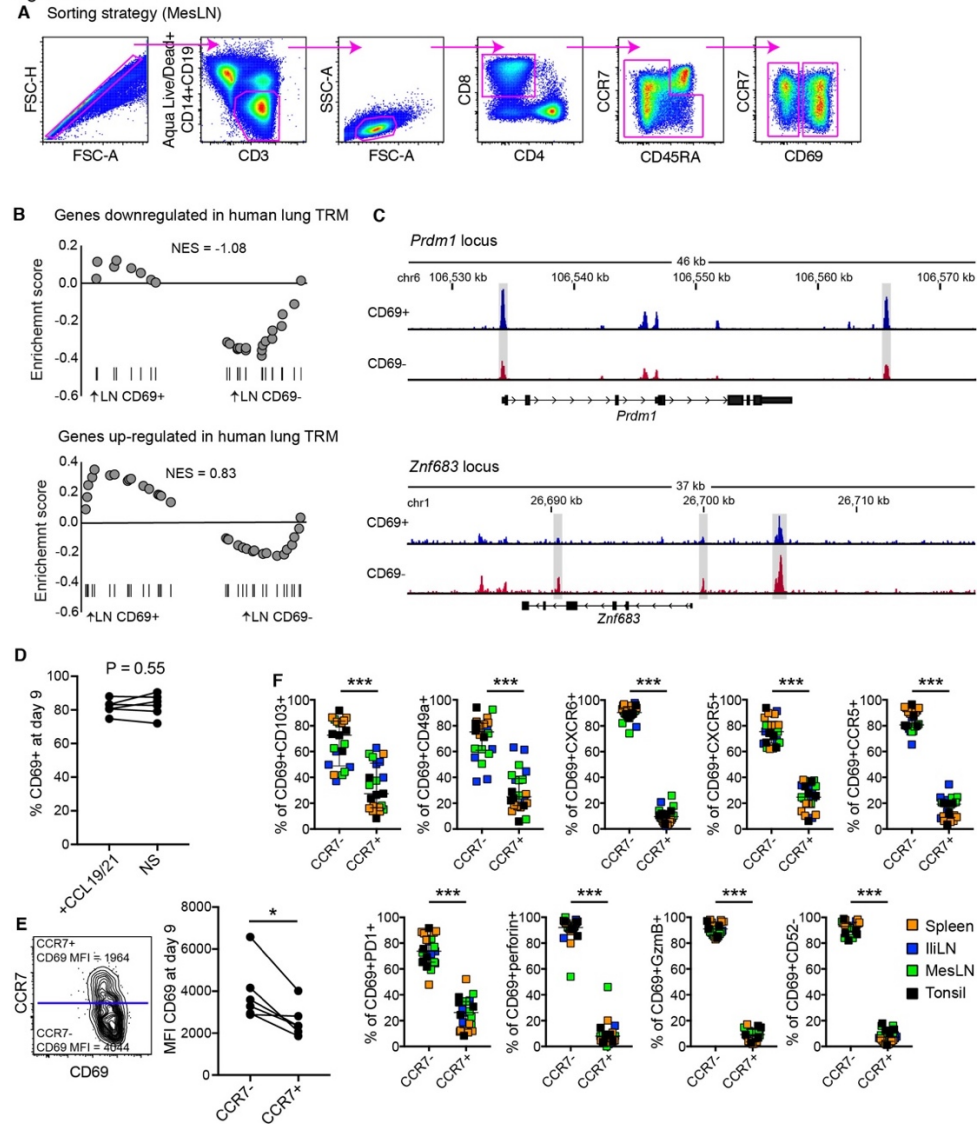

**Fig. S5. RNA-seq, ATAC-seq, and CCR7 analysis of LN TRMs**

(A) Gating strategy for RNA-seq and ATAC-seq sorts to acquire pure LN memory CD69<sup>-</sup> and CD69<sup>+</sup> CD8<sup>+</sup> T cell populations. (B) Normalized enrichment score (NES) of upregulated and downregulated gene sets from lung TRMs (CD69<sup>+</sup> CD103<sup>+</sup>) (37) in MesLN memory CD69<sup>-</sup> versus CD69<sup>+</sup> CD8<sup>+</sup> T cells. (C) ATAC-seq tracks for the *Prdm1* (*Blimp-1*) and *Znf683* (*Hobit*) locus. (D) Frequency of CD69 expression on sorted CD69<sup>+</sup> CD8<sup>+</sup> T cells after 9 days in culture with rhIL-7 in the presence or absence of CCL19/21. (E) Median fluorescence intensity (MFI) of CD69 expression on CCR7<sup>-</sup> and CCR7<sup>+</sup> CD69<sup>+</sup> CD8<sup>+</sup> T cells after 9 days in culture with rhIL-7. (F) Expression of residency and effector molecules on CCR7<sup>-</sup> and CCR7<sup>+</sup> CD69<sup>+</sup> CD8<sup>+</sup> T cells. \**P* < 0.05; \*\**P* < 0.01; \*\*\**P* < 0.001.

Related to Fig. 3

Figure S6

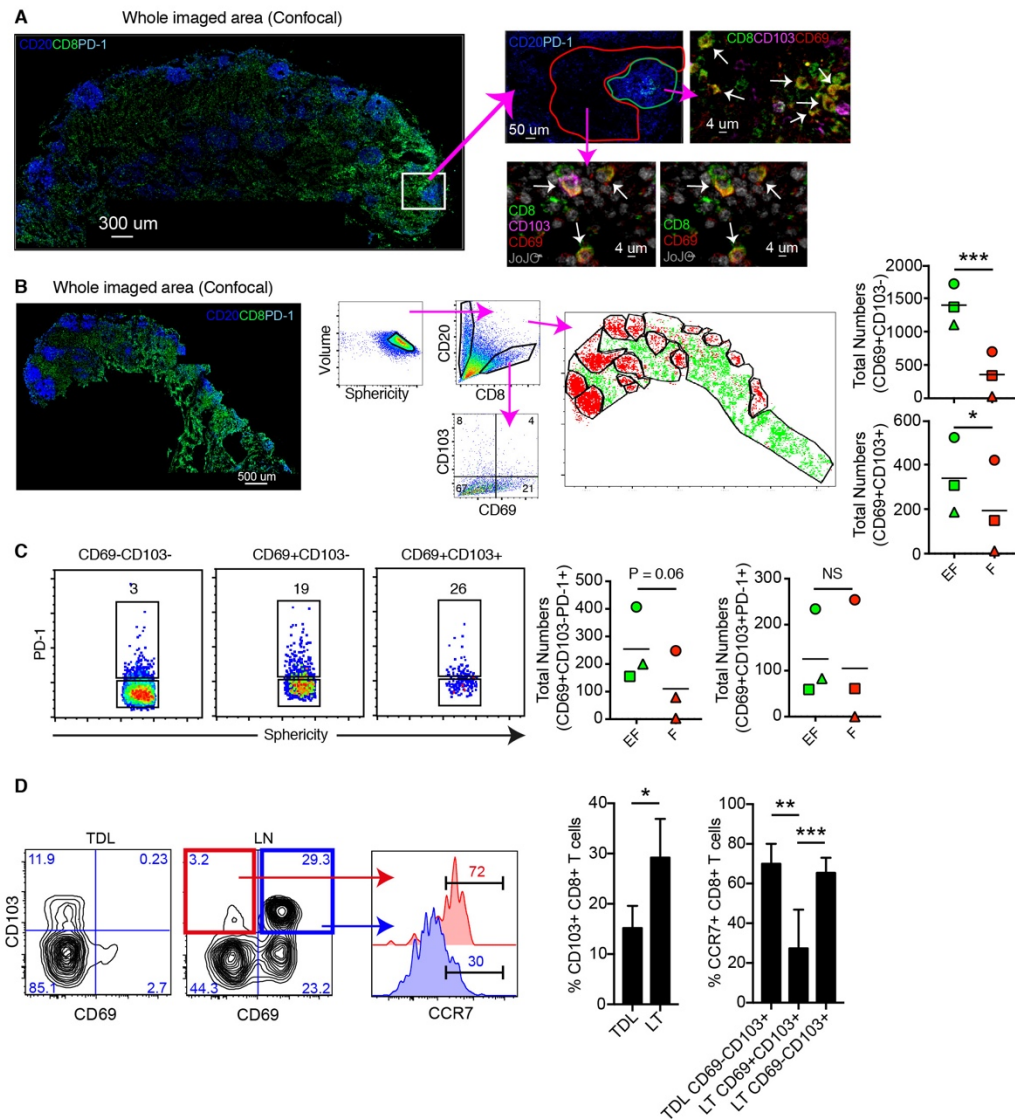

**Fig. S6. Imaging analysis and CD103 expression in TDL**

**(A)** Whole imaged area of a mesLN from human (left) and zoomed in area (right) of a T cell zone (red) and B cell zone (green). Further zooming shows the co-expression pattern of CD8, CD103 and CD69. Cells expressing both CD69 and CD8 (yellow cells) are highlighted with the white arrows. **(B)** Whole imaged area of another mesLN (left) and subsequent histocytometry gating strategy to identify B cell follicles based on CD20 expression (red) and extra-follicular areas (green) in the whole imaged area using histocytometry (middle). Right graphs, shows the absolute numbers of CD69<sup>+</sup>CD103<sup>-</sup> and CD69<sup>+</sup>CD103<sup>+</sup> within the extra-follicular (EF) or B cell follicular (F) area for all imaged LNs. **(C)** PD-1 expression based on histocytometry for CD69<sup>-</sup>CD103<sup>-</sup>, CD69<sup>+</sup>CD103<sup>-</sup> and CD69<sup>+</sup>CD103<sup>+</sup> CD8<sup>+</sup> cells (left). Right graphs, shows the absolute numbers of CD69<sup>+</sup>CD103<sup>-</sup>PD-1<sup>+</sup> and CD69<sup>+</sup>CD103<sup>+</sup>PD-1<sup>+</sup> within the extra-follicular (EF) or B cell follicular (F) area for all imaged LNs. **(D)** Conventional flow

cytometry plots of CD103 *versus* CD69 on human thoracic duct lymph (TDL) and lymph node (LN) memory CD8<sup>+</sup> T cells from two unmatched subjects (left). The histogram demonstrates CCR7 expression levels on CD103<sup>+</sup>CD69<sup>-</sup> (red) and CD103<sup>+</sup>CD69<sup>+</sup> (blue) cells from LN CD8<sup>+</sup> T cells. Frequency of CD103<sup>+</sup> CD8<sup>+</sup> T cells (left graph) and CCR7<sup>+</sup> of CD103<sup>+</sup>CD69<sup>+/-</sup> CD8<sup>+</sup> T cells (right graph) in TDL (n = 7 subjects) and LTs from all subjects (n = 25) in Fig. 2A. \**P* < 0.05; \*\**P* < 0.01; \*\*\**P* < 0.001.

Related to Fig. 4

Figure S7

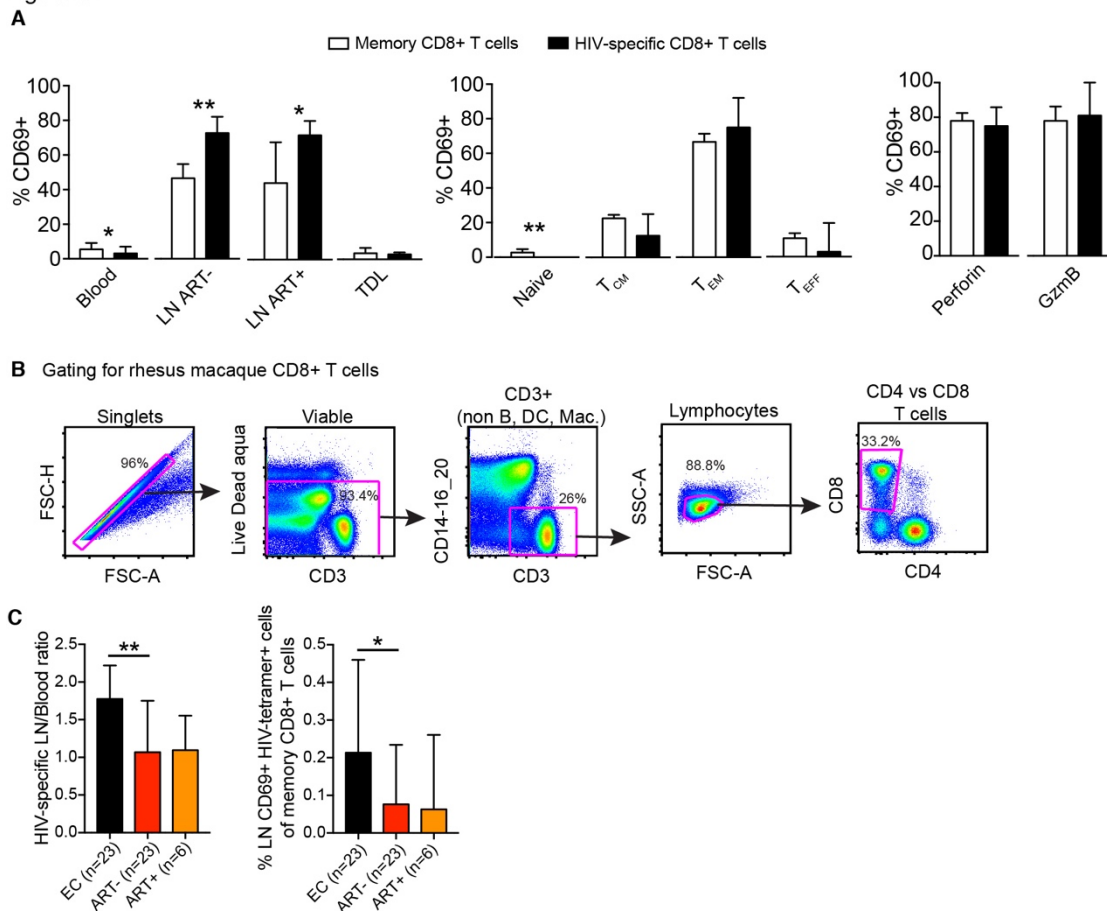

**Fig. S7. Bulk and HIV-specific analysis and rhesus gating strategy**

**(A)** Frequency of CD69+ cells between bulk memory and HIV-specific CD8+ T cells ( $n = 17$ ). **(B)** Gating strategy to detect total LT and blood CD8+ T cells for all rhesus macaque analysis. **(C)** Relative distribution of HIV-specific CD8+ T cells in blood and LNs from elite controllers (black), ART<sup>-</sup> (red) and ART<sup>+</sup> (orange) HIV<sup>+</sup> subjects (left) and magnitude of LN HIV-tetramer<sup>+</sup> CD69<sup>+</sup> CD8<sup>+</sup> T cell responses in elite controllers (black), ART<sup>-</sup> (red) and ART<sup>+</sup> (orange) HIV<sup>+</sup> subjects. \* $P < 0.05$ ; \*\* $P < 0.01$ .

Related to Fig. 5-7



Figure S8

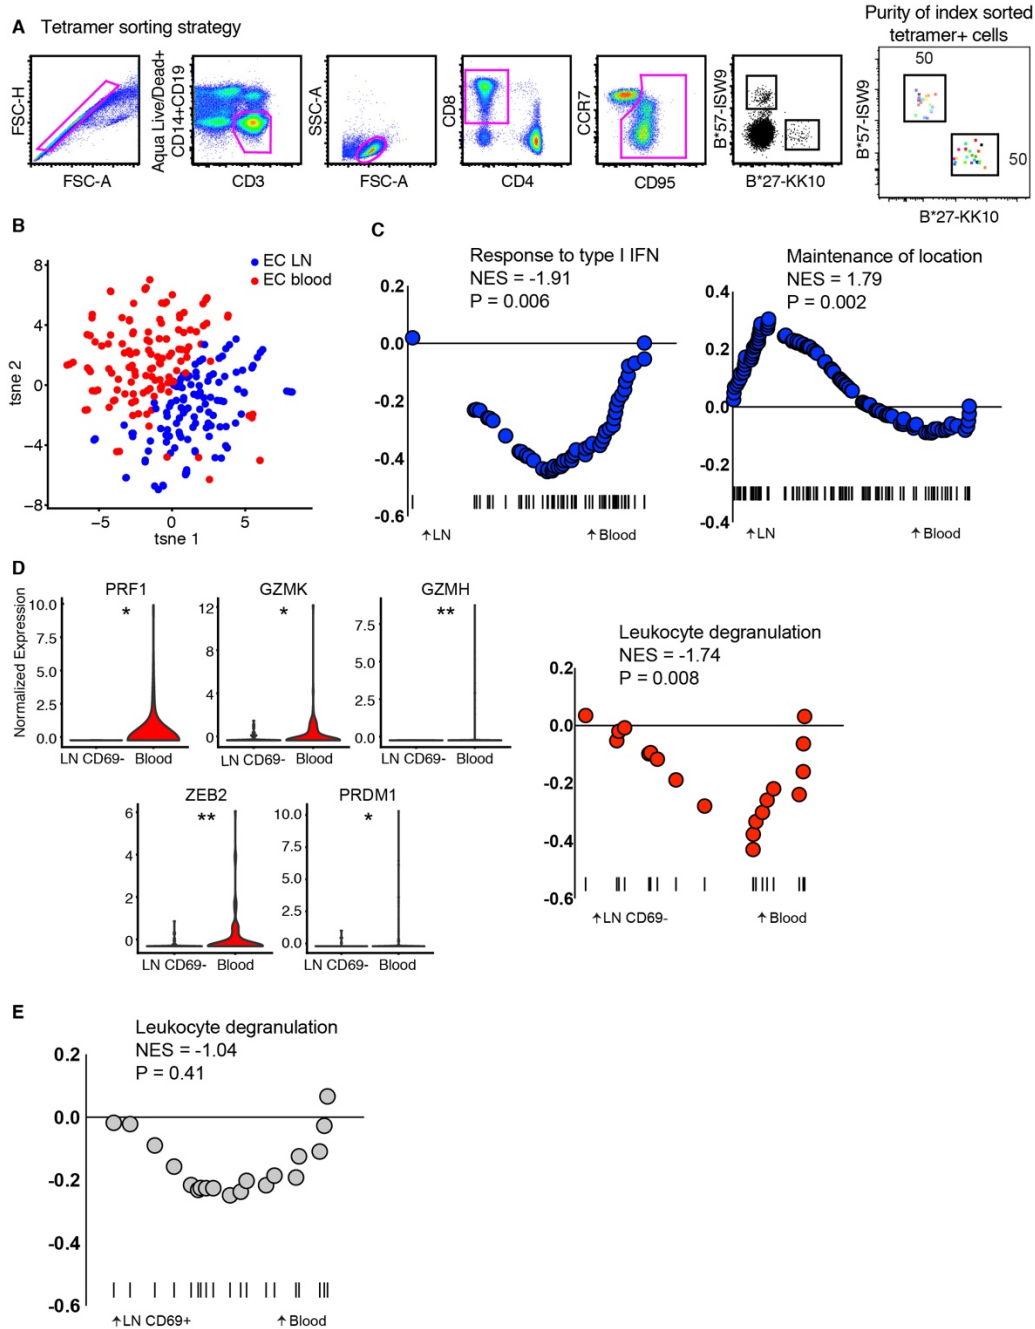

**Fig. S8. Index sorting strategy and scRNA-seq analysis**

**(A)** Gating strategy for index sorting of LN and blood HIV-specific CD8<sup>+</sup> T cells and purity of index-sorted HIV-specific CD8<sup>+</sup> T cells. Memory cells were gated as non-CCR7<sup>hi</sup> non-CD95<sup>-</sup> to include stem-cell memory T cells (T<sub>SCMs</sub>). **(B)** tSNE plot of single HIV-specific CD8<sup>+</sup> T cells from LN (blue) and blood (red) from elite controllers (n=2). The plot is based on the top 200 significant genes differentially expressed between groups in the scRNA-seq data set. **(C)** Significant GSEAs of gene sets involved in immunological reactions and trafficking from LN versus blood HIV-specific CD8<sup>+</sup> T cells. **(D)** Violin plots and GSEAs for genes and gene sets involved in cytolytic T cell responses from LN CD69<sup>-</sup> and blood HIV-specific CD8<sup>+</sup> T cells. **(E)** Leukocyte degranulation GSEA between LN CD69<sup>+</sup> and blood HIV-specific CD8<sup>+</sup> T cells.

Related to Fig. 8

Figure S9

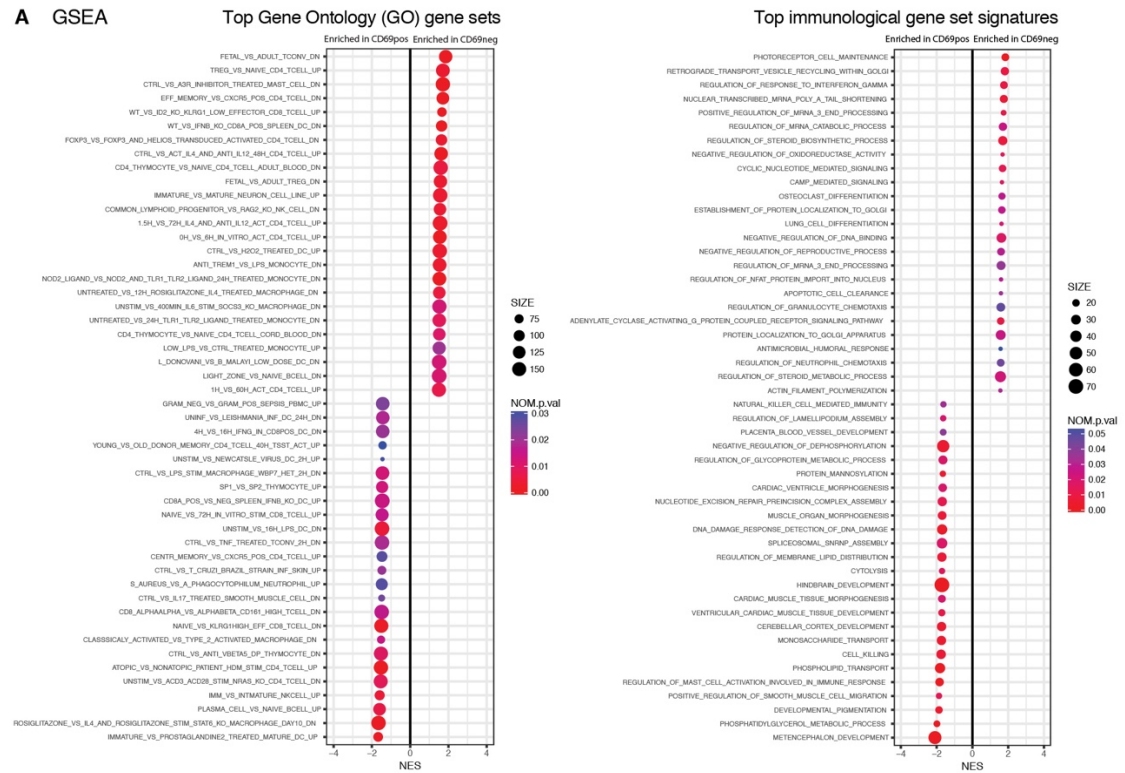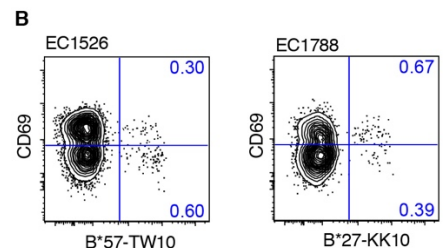

**Fig S9. scRNA-seq analysis**

**(A)** Gene set enrichment analysis (GSEA) between the two CD8<sup>+</sup> T cell subsets of all significantly enriched gene signatures from the Gene Ontology (GO) and Immunological Signature database. **(B)** CD69 expression on Gag-ISW9-specific CD8<sup>+</sup> T cells from subjects EC1526 and EC1788 (left).

Related to Fig. 8



**Table S1: Cohort characteristics**

|                         | <b>HIV-</b>                                                                                                                     | <b>HIV+ acute<br/>(Fiebig IV-<br/>VI)</b> | <b>HIV+<br/>chronic<br/>ART-</b>                                                                      | <b>HIV+<br/>chronic<br/>ART+</b>                                   | <b>HIV elite<br/>controllers</b>                                           |
|-------------------------|---------------------------------------------------------------------------------------------------------------------------------|-------------------------------------------|-------------------------------------------------------------------------------------------------------|--------------------------------------------------------------------|----------------------------------------------------------------------------|
| Number of individuals   | 51                                                                                                                              | 8                                         | 36                                                                                                    | 19                                                                 | 9                                                                          |
| Sites of collection     | University of Pennsylvania, Case Western Reserve University                                                                     | INER-CIENI                                | University of Pennsylvania, INER-CIENI                                                                | University of Pennsylvania, INER-CIENI                             | UCSF, INER-CIENI                                                           |
| Types of tissues        | Blood (n=11), spleen (n=8), tonsil (n=7), iliac LNs (n=7), mesenteric LNs (n=9), hepatic LNs (n=2), matched blood and TDL (n=7) | Matched blood and cervical LNs (n=8)      | Matched blood and cervical LNs (n=34), matched blood and iliac LNs (n=1), matched blood and TDL (n=1) | Matched blood and cervical LNs (n=11), matched blood and TDL (n=8) | Matched blood and inguinal LNs (n=8), matched blood and cervical LNs (n=1) |
| Age*                    | N/A                                                                                                                             | 23 (21-27)                                | 29 (23-33)                                                                                            | 29 (28-39)                                                         | 49 (39-63)                                                                 |
| CD4 count (cells/mL)*   | N/A                                                                                                                             | 306 (238-370)                             | 348 (248-497)                                                                                         | 382 (367-811)                                                      | 835 (643-1111)                                                             |
| Viral load (copies/mL)* | 0                                                                                                                               | 1,996,027 (1,297,461-4,421,034)           | 75,043 (22,429-203,904)                                                                               | <40 (<40-230,948)                                                  | <40 (<40-<40)                                                              |
| Log viral load*         | N/A                                                                                                                             | 6 (6.11-6.63)                             | 4.90 (4.46-5.32)                                                                                      | <1.6 (<1.6-5.36)                                                   | <1.6 (<1.6-<1.6)                                                           |

\* All values = median and IQR

**Table S2, related to Figure 3. List of significant genes up-/downregulated from RNA-seq**

| EntrezGeneID | Gene name | FoldChange: (CD69+/CD69-) | P-value     |
|--------------|-----------|---------------------------|-------------|
| 817          | CAMK2D    | 3.908224116               | 0.014685002 |
| 1647         | GADD45A   | 3.560060748               | 0.02032066  |
| 1901         | S1PR1     | -4.881264449              | 0.006484687 |
| 1955         | MEGF9     | 5.394509019               | 0.00441564  |
| 2043         | EPHA4     | -5.730196718              | 0.003486607 |
| 2591         | GALNT3    | -3.38533766               | 0.024087524 |
| 2595         | GANC      | -5.109049649              | 0.005448088 |
| 2635         | GBP3      | -6.144331082              | 0.002644247 |
| 2838         | GPR15     | 2.829498872               | 0.042750171 |
| 2857         | GPR34     | -8.052667069              | 0.000879656 |
| 2937         | GSS       | 3.299371014               | 0.026236322 |
| 3310         | HSPA6     | -2.802603634              | 0.044009595 |
| 3384         | ICAM2     | -3.467960182              | 0.02221301  |
| 3566         | IL4R      | -3.080580261              | 0.032786152 |
| 3590         | IL11RA    | -4.479423789              | 0.008952138 |
| 3638         | INSIG1    | 9.643180989               | 0.000414506 |
| 3640         | INSL3     | -18.62786107              | 2.47792E-05 |
| 3678         | ITGA5     | -3.123653733              | 0.03135947  |
| 4293         | MAP3K9    | 5.701837017               | 0.003555349 |
| 4515         | MTCP1     | -4.005162055              | 0.013458441 |
| 4528         | MTIF2     | -2.735594654              | 0.047335252 |
| 4616         | GADD45B   | -4.708224746              | 0.007432374 |
| 4621         | MYH3      | -4.029960755              | 0.013164347 |
| 4668         | NAGA      | 3.982086603               | 0.013739089 |
| 4734         | NEDD4     | 3.480574034               | 0.021942045 |
| 4913         | NTHL1     | -2.876456267              | 0.040648519 |
| 5367         | PMCH      | 9.218949204               | 0.0005007   |
| 5395         | PMS2      | -3.276444454              | 0.026846467 |
| 5830         | PEX5      | 3.690611349               | 0.017951726 |
| 5914         | RARA      | -4.639165158              | 0.007856213 |
| 5921         | RASA1     | -3.478197316              | 0.021992805 |
| 5932         | RBBP8     | -5.149195382              | 0.005286616 |
| 6019         | RLN2      | -3.003081042              | 0.03554561  |
| 6314         | ATXN7     | -4.113235185              | 0.01223085  |
| 6375         | XCL1      | 3.749921904               | 0.016983402 |
| 6402         | SELL      | -9.535111395              | 0.000434621 |
| 6541         | SLC7A1    | 2.867385589               | 0.041045131 |
| 6843         | VAMP1     | 2.756772284               | 0.046254287 |
| 6877         | TAF5      | 4.006716964               | 0.013439774 |

|       |          |              |             |
|-------|----------|--------------|-------------|
| 7433  | VIPR1    | -5.096113773 | 0.005501373 |
| 7476  | WNT7A    | -22.77170937 | 1.03749E-05 |
| 7678  | ZNF124   | -6.067215939 | 0.002780695 |
| 7692  | ZNF133   | -3.935841741 | 0.014322594 |
| 8879  | SGPL1    | -3.302054084 | 0.026165974 |
| 9046  | DOK2     | -3.431161944 | 0.02302607  |
| 9110  | MTMR4    | -2.727653048 | 0.047747983 |
| 9136  | RRP9     | 3.798906349  | 0.016229682 |
| 9200  | HACD1    | 6.661607006  | 0.001911444 |
| 9425  | CDYL     | -2.914347379 | 0.039038423 |
| 9531  | BAG3     | -2.972686453 | 0.036700037 |
| 9827  | RGP1     | 3.839030605  | 0.015641473 |
| 9975  | NR1D2    | -2.809220234 | 0.043695885 |
| 10077 | TSPAN32  | -5.436404846 | 0.004284683 |
| 10172 | ZNF256   | 2.814572059  | 0.043444003 |
| 10235 | RASGRP2  | -4.44346449  | 0.009223383 |
| 10296 | MAEA     | 5.421206591  | 0.004331643 |
| 10420 | TESK2    | -2.703846466 | 0.049009886 |
| 10509 | SEMA4B   | -2.749827452 | 0.046605652 |
| 10516 | FBLN5    | -3.438614662 | 0.022858637 |
| 10527 | IPO7     | -3.647981906 | 0.018687824 |
| 10750 | GRAP     | -17.8684944  | 2.96656E-05 |
| 10802 | SEC24A   | 2.934783594  | 0.038200383 |
| 11035 | RIPK3    | 5.273344119  | 0.004822348 |
| 11094 | CACFD1   | 4.146185737  | 0.011883241 |
| 11133 | KPTN     | -7.233174996 | 0.00136792  |
| 22821 | RASA3    | -3.754180925 | 0.01691626  |
| 22879 | MON1B    | 2.990163224  | 0.036031076 |
| 23059 | CLUAP1   | -4.584439618 | 0.008212658 |
| 23312 | DMXL2    | -2.900650144 | 0.03961189  |
| 23334 | SZT2     | -3.403909489 | 0.023650609 |
| 23353 | SUN1     | -5.02072808  | 0.005824618 |
| 23368 | PPP1R13B | -3.297395288 | 0.026288263 |
| 23400 | ATP13A2  | -2.883712443 | 0.040334395 |
| 23594 | ORC6     | -5.816043399 | 0.003288063 |
| 23643 | LY96     | -3.724709321 | 0.017387345 |
| 23708 | GSPT2    | -4.385570709 | 0.009680907 |
| 25888 | ZNF473   | 5.330812599  | 0.004624078 |
| 25914 | RTTN     | 2.894038511  | 0.039892145 |
| 25939 | SAMHD1   | -3.353722048 | 0.024853095 |
| 25940 | FAM98A   | -4.198314418 | 0.011356898 |
| 25945 | NECTIN3  | 6.540180507  | 0.002058721 |

|       |            |              |             |
|-------|------------|--------------|-------------|
| 25966 | C2CD2      | -2.759256244 | 0.046129346 |
| 26048 | ZNF500     | -3.811938921 | 0.01603582  |
| 26128 | KIF1BP     | 3.942818005  | 0.014232723 |
| 27018 | BEX3       | -5.253322034 | 0.004893811 |
| 27153 | ZNF777     | 3.01660433   | 0.035045419 |
| 28658 | TRAV25     | 5.417604693  | 0.004342863 |
| 28802 | IGLV3-12   | -3.678605637 | 0.018155538 |
| 28990 | ASTE1      | -3.534271691 | 0.020830873 |
| 29803 | REPIN1     | -3.508976096 | 0.021345924 |
| 29925 | GMPPB      | 3.181963067  | 0.02954076  |
| 29933 | GPR132     | -2.843748289 | 0.042099588 |
| 29966 | STRN3      | -6.864850872 | 0.001692417 |
| 29994 | BAZ2B      | -4.336062621 | 0.01009368  |
| 30009 | TBX21      | 2.849439052  | 0.041842926 |
| 50632 | CALY       | 3.929375072  | 0.014406497 |
| 51274 | KLF3       | -2.742195066 | 0.046995303 |
| 51333 | ZNF771     | 3.474397116  | 0.02207425  |
| 51360 | MBTPS2     | -3.271990435 | 0.026966902 |
| 51439 | FAM8A1     | -3.520283656 | 0.02111387  |
| 51651 | PTRH2      | 3.629367272  | 0.01902031  |
| 53405 | CLIC5      | -17.47841338 | 3.26345E-05 |
| 54434 | SSH1       | 3.118709863  | 0.031519531 |
| 54762 | GRAMD1C    | -8.00892208  | 0.000899707 |
| 54790 | TET2       | -5.032938802 | 0.005770747 |
| 54892 | NCAPG2     | -4.520470679 | 0.00865403  |
| 55170 | PRMT6      | 2.752115998  | 0.046489532 |
| 55175 | KLHL11     | 3.159454225  | 0.030227999 |
| 55293 | UEVLD      | 3.222665209  | 0.028343391 |
| 55317 | AP5S1      | -4.632804491 | 0.007896681 |
| 55364 | IMPACT     | 2.87430331   | 0.040742259 |
| 55571 | CNOT11     | -2.857495104 | 0.041482634 |
| 55609 | ZNF280C    | 4.789894965  | 0.006965829 |
| 55703 | POLR3B     | 3.081242339  | 0.032763664 |
| 55790 | CSGALNACT1 | -4.556288734 | 0.008403508 |
| 55825 | PECR       | -3.288419389 | 0.026525748 |
| 56478 | EIF4ENIF1  | 3.634555437  | 0.018926949 |
| 56895 | AGPAT4     | -5.806663816 | 0.003309081 |
| 56899 | ANKS1B     | 3.110524138  | 0.031786625 |
| 56911 | MAP3K7CL   | 4.280098954  | 0.010585701 |
| 57085 | AGTRAP     | -5.033691843 | 0.005767444 |
| 57171 | DOLPP1     | 15.1206543   | 6.09596E-05 |
| 57178 | ZMIZ1      | 3.560797748  | 0.020306296 |

|        |          |              |             |
|--------|----------|--------------|-------------|
| 57205  | ATP10D   | 3.413323627  | 0.023432662 |
| 57463  | AMIGO1   | -3.405775938 | 0.023607212 |
| 57496  | MKL2     | -2.737723214 | 0.047225318 |
| 57558  | USP35    | -2.755003435 | 0.046343493 |
| 59338  | PLEKHA1  | -4.295448366 | 0.010447973 |
| 64131  | XYLT1    | -4.29867959  | 0.010419252 |
| 64332  | NFKBIZ   | -2.734316664 | 0.047401396 |
| 64412  | GZF1     | 4.324707859  | 0.010191276 |
| 64753  | CCDC136  | -3.70194973  | 0.017761703 |
| 64794  | DDX31    | 3.207855909  | 0.028772431 |
| 65083  | NOL6     | -4.119352849 | 0.012165412 |
| 79081  | LBHD1    | -3.766827248 | 0.016718723 |
| 79567  | FAM65A   | -3.020038642 | 0.034919684 |
| 79600  | TCTN1    | -2.896082363 | 0.039805268 |
| 79711  | IPO4     | 2.879111053  | 0.040533269 |
| 79803  | HPS6     | 2.989115715  | 0.036070776 |
| 79862  | ZNF669   | 4.248539928  | 0.010875702 |
| 80007  | C10orf88 | 2.932124163  | 0.038308266 |
| 80267  | EDEM3    | -3.287185279 | 0.026558594 |
| 80833  | APOL3    | -2.866850698 | 0.041068657 |
| 81537  | SGPP1    | 4.297787407  | 0.010427173 |
| 81931  | ZNF93    | 3.569739498  | 0.020132956 |
| 83743  | GRWD1    | 2.824557368  | 0.042978456 |
| 83888  | FGFBP2   | -6.287899165 | 0.002411117 |
| 84033  | OBSCN    | -2.987394385 | 0.036136121 |
| 84318  | CCDC77   | -5.410438446 | 0.004365289 |
| 84343  | HPS3     | -3.552033147 | 0.020477897 |
| 84766  | CRACR2A  | 4.353692673  | 0.009944337 |
| 84883  | AIFM2    | -5.420249822 | 0.00433462  |
| 84969  | TOX2     | 3.48648486   | 0.0218164   |
| 90673  | PPP1R3E  | -2.81752238  | 0.043305854 |
| 91151  | TIGD7    | 3.012052957  | 0.035212854 |
| 91316  | GUSBP11  | -3.997342438 | 0.01355278  |
| 91351  | DDX60L   | -3.862521875 | 0.015308746 |
| 91687  | CENPL    | 3.771207581  | 0.016650935 |
| 91694  | LONRF1   | 3.104954376  | 0.031969855 |
| 93624  | TADA2B   | -3.324737811 | 0.025579902 |
| 113655 | MFSD3    | -3.102174541 | 0.032061759 |
| 114625 | ERMAP    | -5.047077805 | 0.005709111 |
| 116447 | TOP1MT   | 3.828594895  | 0.01579201  |
| 116988 | AGAP3    | -3.255765825 | 0.027410942 |
| 117145 | THEM4    | -2.702224979 | 0.049097201 |

|           |             |              |             |
|-----------|-------------|--------------|-------------|
| 124044    | SPATA2L     | 3.104789473  | 0.031975298 |
| 127544    | RNF19B      | 4.585589255  | 0.008204974 |
| 128346    | C1orf162    | -4.018304231 | 0.013301629 |
| 132720    | C4orf32     | -2.890907921 | 0.040025635 |
| 143888    | KDELC2      | 3.754465861  | 0.016911779 |
| 145864    | HAPLN3      | -3.983865603 | 0.013717208 |
| 147699    | PPM1N       | -7.037835905 | 0.001529568 |
| 153241    | CEP120      | 3.704289107  | 0.017722791 |
| 153733    | CCDC112     | -3.092348268 | 0.032389076 |
| 158399    | ZNF483      | -2.756944249 | 0.046245625 |
| 158584    | FAAH2       | -3.901089179 | 0.014780379 |
| 161823    | ADAL        | -3.385809628 | 0.024076305 |
| 200933    | FBXO45      | -2.795143316 | 0.044366388 |
| 219844    | HYLS1       | -3.150308162 | 0.030512512 |
| 221322    | TBC1D32     | -4.154645011 | 0.011795895 |
| 222658    | KCTD20      | -3.218192393 | 0.028472188 |
| 223082    | ZNRF2       | 2.885160089  | 0.040272058 |
| 252969    | NEIL2       | 7.141260497  | 0.001441259 |
| 257101    | ZNF683      | -4.030256135 | 0.01316089  |
| 283377    | SPRYD4      | 31.61993425  | 2.48814E-06 |
| 285540    | SEPSECS-AS1 | 8.39060885   | 0.000741756 |
| 286437    | #N/A        | -2.733954151 | 0.047420177 |
| 339559    | ZFP69       | -2.692504819 | 0.049624325 |
| 339745    | SPOPL       | -2.763694181 | 0.045907074 |
| 342926    | ZNF677      | 3.254295093  | 0.02745161  |
| 348654    | GEN1        | -3.144011028 | 0.030710199 |
| 374879    | ZNF699      | -3.058829154 | 0.033534932 |
| 374928    | ZNF773      | 2.73611856   | 0.047308167 |
| 400073    | C12orf76    | -3.193391611 | 0.029198747 |
| 401612    | SLC25A53    | -5.228297503 | 0.004984924 |
| 646719    | NIPBL-AS1   | -5.137879022 | 0.005331544 |
| 729218    | #N/A        | 2.898097571  | 0.039719821 |
| 100505746 | ITGB2-AS1   | -4.257817581 | 0.010789481 |
| 101927156 | #N/A        | -3.616007022 | 0.019263219 |
| 101929206 | #N/A        | -9.410939969 | 0.000459224 |
| 102606465 | #N/A        | -3.846535704 | 0.015534255 |
| 102724316 | SVIL-AS1    | 2.965450085  | 0.036981187 |
| 104472713 | PCAT29      | 4.623094132  | 0.007958942 |
| 105221694 | BISPR       | -2.893490813 | 0.039915462 |
| 105369174 | #N/A        | 4.851368907  | 0.006637611 |

**Table S3, related to Figure 3. List of 500 significant ATAC-seq tracks**

|    | Gene         | chr   | start     | end       | log2FoldChange | pvalue   |
|----|--------------|-------|-----------|-----------|----------------|----------|
| 1  | peakid_21109 | chr2  | 9843224   | 9843819   | 2.25688        | 9.37E-21 |
| 2  | peakid_4785  | chr10 | 30024049  | 30025123  | 1.97059        | 1.11E-18 |
| 3  | peakid_16122 | chr17 | 2717797   | 2718710   | 2.05739        | 2.67E-18 |
| 4  | peakid_7993  | chr11 | 104034585 | 104035258 | -1.46203       | 1.06E-15 |
| 5  | peakid_28754 | chr3  | 148727321 | 148728016 | -1.24072       | 7.14E-14 |
| 6  | peakid_18526 | chr18 | 42686277  | 42686822  | -1.79287       | 1.96E-12 |
| 7  | peakid_31835 | chr5  | 64317419  | 64317830  | -1.98829       | 2.69E-12 |
| 8  | peakid_39896 | chr8  | 128990012 | 128990455 | -1.40952       | 4.03E-11 |
| 9  | peakid_10065 | chr12 | 92270614  | 92271419  | -0.89183       | 8.55E-11 |
| 10 | peakid_30726 | chr4  | 122175089 | 122176089 | -1.15378       | 8.00E-11 |
| 11 | peakid_16129 | chr17 | 2952044   | 2952640   | 1.60056        | 1.35E-10 |
| 12 | peakid_4783  | chr10 | 29970587  | 29971319  | 1.76158        | 1.68E-10 |
| 13 | peakid_1917  | chr1  | 101178436 | 101179133 | -1.12081       | 3.82E-10 |
| 14 | peakid_34636 | chr6  | 45553998  | 45554978  | 1.65793        | 5.49E-10 |
| 15 | peakid_9855  | chr12 | 68553214  | 68553926  | -1.22141       | 7.23E-10 |
| 16 | peakid_21485 | chr2  | 36467492  | 36468247  | -1.15202       | 6.46E-10 |
| 17 | peakid_27840 | chr3  | 67998272  | 67998988  | 1.47267        | 7.25E-10 |
| 18 | peakid_23606 | chr2  | 197107037 | 197107534 | -1.25941       | 8.41E-10 |
| 19 | peakid_34981 | chr6  | 96947489  | 96948162  | 1.20211        | 8.24E-10 |
| 20 | peakid_5149  | chr10 | 64440985  | 64441601  | -0.98448       | 1.01E-09 |
| 21 | peakid_35043 | chr6  | 106094052 | 106094844 | -1.12729       | 1.09E-09 |
| 22 | peakid_11574 | chr13 | 80973552  | 80974400  | -1.47944       | 1.44E-09 |
| 23 | peakid_39636 | chr8  | 105677412 | 105678221 | -1.88020       | 1.87E-09 |
| 24 | peakid_14705 | chr16 | 2317743   | 2319015   | 1.04699        | 2.22E-09 |
| 25 | peakid_6701  | chr11 | 14599877  | 14600582  | -1.06258       | 2.40E-09 |
| 26 | peakid_28162 | chr3  | 108524931 | 108525734 | -0.94326       | 2.64E-09 |
| 27 | peakid_40309 | chr9  | 5558205   | 5558667   | 1.81780        | 2.68E-09 |
| 28 | peakid_4782  | chr10 | 29947892  | 29948432  | 1.35075        | 3.00E-09 |
| 29 | peakid_21489 | chr2  | 36582578  | 36583803  | -0.88714       | 3.93E-09 |
| 30 | peakid_14758 | chr16 | 3184651   | 3185379   | 1.14190        | 4.08E-09 |
| 31 | peakid_1740  | chr1  | 91590480  | 91591006  | -1.71857       | 4.25E-09 |
| 32 | peakid_11187 | chr13 | 41885031  | 41886212  | -0.76656       | 5.38E-09 |
| 33 | peakid_10888 | chr13 | 22688671  | 22689250  | -1.01598       | 5.64E-09 |
| 34 | peakid_21064 | chr2  | 7884983   | 7885436   | -1.31965       | 6.61E-09 |
| 35 | peakid_14634 | chr16 | 729776    | 730616    | 1.13928        | 6.95E-09 |
| 36 | peakid_10103 | chr12 | 92987323  | 92988264  | -0.80839       | 7.89E-09 |
| 37 | peakid_41831 | chr9  | 139257466 | 139258501 | 1.13982        | 8.12E-09 |
| 38 | peakid_35626 | chr6  | 138132503 | 138132973 | -1.11406       | 8.47E-09 |
| 39 | peakid_39635 | chr8  | 105600974 | 105601790 | -1.51729       | 9.29E-09 |
| 40 | peakid_31566 | chr5  | 40378487  | 40379012  | -1.36044       | 1.01E-08 |

|    |              |       |           |           |          |          |
|----|--------------|-------|-----------|-----------|----------|----------|
| 41 | peakid_18517 | chr18 | 42280625  | 42281012  | -1.46001 | 1.13E-08 |
| 42 | peakid_19740 | chr19 | 17112514  | 17113106  | 1.51444  | 1.39E-08 |
| 43 | peakid_3299  | chr1  | 198136450 | 198137110 | -1.00014 | 1.50E-08 |
| 44 | peakid_4275  | chr10 | 3846500   | 3847002   | -1.18223 | 1.58E-08 |
| 45 | peakid_26755 | chr22 | 50945903  | 50947063  | 0.98160  | 1.56E-08 |
| 46 | peakid_28200 | chr3  | 111327286 | 111327633 | -1.44460 | 1.53E-08 |
| 47 | peakid_27062 | chr3  | 18720792  | 18721214  | -1.43252 | 1.67E-08 |
| 48 | peakid_366   | chr1  | 15850631  | 15851837  | 0.79840  | 1.83E-08 |
| 49 | peakid_5153  | chr10 | 64492598  | 64493196  | -0.96747 | 1.94E-08 |
| 50 | peakid_35397 | chr6  | 130005118 | 130005567 | -1.12424 | 2.05E-08 |
| 51 | peakid_35618 | chr6  | 138036718 | 138037391 | -1.01536 | 2.07E-08 |
| 52 | peakid_29269 | chr3  | 187778901 | 187779478 | -1.30268 | 2.63E-08 |
| 53 | peakid_28203 | chr3  | 111334972 | 111335818 | -0.75819 | 2.98E-08 |
| 54 | peakid_41591 | chr9  | 131418742 | 131419493 | 1.26780  | 3.52E-08 |
| 55 | peakid_29276 | chr3  | 188057230 | 188058031 | -1.18035 | 4.36E-08 |
| 56 | peakid_27141 | chr3  | 28367803  | 28368565  | -0.87833 | 4.56E-08 |
| 57 | peakid_34300 | chr6  | 33377856  | 33379136  | 0.80888  | 4.90E-08 |
| 58 | peakid_40907 | chr9  | 84304288  | 84305106  | -1.33202 | 5.25E-08 |
| 59 | peakid_13861 | chr15 | 60095735  | 60096384  | 1.67270  | 6.04E-08 |
| 60 | peakid_1627  | chr1  | 85464665  | 85465083  | -0.98301 | 6.32E-08 |
| 61 | peakid_28176 | chr3  | 109525648 | 109526274 | -0.91181 | 6.58E-08 |
| 62 | peakid_2987  | chr1  | 172668261 | 172668793 | -1.05554 | 7.00E-08 |
| 63 | peakid_20273 | chr19 | 41256212  | 41257292  | 0.97391  | 6.99E-08 |
| 64 | peakid_41838 | chr9  | 139377210 | 139378643 | 0.85332  | 7.68E-08 |
| 65 | peakid_14702 | chr16 | 2264617   | 2265486   | 0.88774  | 8.11E-08 |
| 66 | peakid_7996  | chr11 | 104524041 | 104524573 | -1.33087 | 8.46E-08 |
| 67 | peakid_6707  | chr11 | 14912598  | 14914129  | -0.62929 | 9.45E-08 |
| 68 | peakid_20852 | chr19 | 54693161  | 54695323  | 0.66780  | 9.50E-08 |
| 69 | peakid_32882 | chr5  | 142166464 | 142166864 | -1.30564 | 9.27E-08 |
| 70 | peakid_17933 | chr17 | 76356061  | 76356637  | 1.23503  | 9.79E-08 |
| 71 | peakid_35590 | chr6  | 137355042 | 137355461 | -1.05326 | 1.03E-07 |
| 72 | peakid_28175 | chr3  | 109523600 | 109524026 | -1.13097 | 1.08E-07 |
| 73 | peakid_15150 | chr16 | 29816594  | 29817464  | 1.02325  | 1.27E-07 |
| 74 | peakid_2591  | chr1  | 155292919 | 155294512 | 0.85675  | 1.40E-07 |
| 75 | peakid_12496 | chr14 | 64194272  | 64195205  | -0.81034 | 1.39E-07 |
| 76 | peakid_20351 | chr19 | 42787490  | 42788813  | 0.80131  | 1.46E-07 |
| 77 | peakid_1949  | chr1  | 101804297 | 101804753 | -1.49897 | 1.51E-07 |
| 78 | peakid_26576 | chr22 | 42475281  | 42476294  | 0.89327  | 1.52E-07 |
| 79 | peakid_35600 | chr6  | 137579277 | 137579632 | -1.68464 | 1.58E-07 |
| 80 | peakid_20161 | chr19 | 38806350  | 38807029  | 1.00248  | 1.60E-07 |
| 81 | peakid_23364 | chr2  | 177796527 | 177797060 | -1.17125 | 1.64E-07 |
| 82 | peakid_19396 | chr19 | 9902311   | 9903832   | 0.87051  | 1.75E-07 |



|     |              |       |           |           |          |          |
|-----|--------------|-------|-----------|-----------|----------|----------|
| 83  | peakid_20443 | chr19 | 45681264  | 45682425  | 0.76355  | 1.76E-07 |
| 84  | peakid_2980  | chr1  | 172608072 | 172608908 | -0.85476 | 1.94E-07 |
| 85  | peakid_31929 | chr5  | 71530082  | 71530578  | -1.10329 | 1.92E-07 |
| 86  | peakid_11310 | chr13 | 48611561  | 48612494  | -0.65756 | 2.04E-07 |
| 87  | peakid_41586 | chr9  | 131218053 | 131219379 | 0.84487  | 2.02E-07 |
| 88  | peakid_10097 | chr12 | 92855657  | 92856327  | -1.13904 | 2.20E-07 |
| 89  | peakid_15941 | chr16 | 88700167  | 88701540  | 0.93979  | 2.24E-07 |
| 90  | peakid_14623 | chr16 | 638962    | 640366    | 0.73197  | 2.37E-07 |
| 91  | peakid_28251 | chr3  | 112395682 | 112396107 | -1.01421 | 2.43E-07 |
| 92  | peakid_3624  | chr1  | 207999201 | 207999659 | -0.99828 | 2.47E-07 |
| 93  | peakid_29678 | chr4  | 10956320  | 10956827  | -1.30364 | 2.50E-07 |
| 94  | peakid_7762  | chr11 | 81580423  | 81581497  | -0.56637 | 2.56E-07 |
| 95  | peakid_23201 | chr2  | 169964157 | 169964752 | -0.87366 | 2.59E-07 |
| 96  | peakid_18984 | chr19 | 796890    | 797670    | 0.93352  | 2.75E-07 |
| 97  | peakid_39939 | chr8  | 131080462 | 131081233 | -0.94636 | 2.77E-07 |
| 98  | peakid_18029 | chr17 | 79818156  | 79819425  | 0.72803  | 2.81E-07 |
| 99  | peakid_24128 | chr2  | 231742168 | 231742990 | -0.95327 | 3.10E-07 |
| 100 | peakid_39426 | chr8  | 91479748  | 91480366  | -0.91349 | 3.14E-07 |
| 101 | peakid_18544 | chr18 | 43518408  | 43518996  | -1.33955 | 3.49E-07 |
| 102 | peakid_9865  | chr12 | 68725796  | 68726623  | -0.71742 | 3.62E-07 |
| 103 | peakid_5146  | chr10 | 64391800  | 64392584  | -1.00616 | 3.73E-07 |
| 104 | peakid_5714  | chr10 | 98431137  | 98431636  | -1.60890 | 3.82E-07 |
| 105 | peakid_28261 | chr3  | 112709525 | 112710519 | -0.68037 | 3.98E-07 |
| 106 | peakid_18021 | chr17 | 79519056  | 79520609  | 1.04306  | 4.02E-07 |
| 107 | peakid_12492 | chr14 | 64009637  | 64010629  | -0.67794 | 4.30E-07 |
| 108 | peakid_4292  | chr10 | 4003337   | 4003765   | -1.07665 | 4.43E-07 |
| 109 | peakid_14701 | chr16 | 2255249   | 2256063   | 1.04381  | 4.45E-07 |
| 110 | peakid_24678 | chr20 | 19421794  | 19422209  | -1.64368 | 4.49E-07 |
| 111 | peakid_27001 | chr3  | 16327573  | 16328103  | -1.07342 | 4.50E-07 |
| 112 | peakid_6352  | chr11 | 506344    | 507704    | 0.88528  | 4.75E-07 |
| 113 | peakid_11155 | chr13 | 40962721  | 40963646  | -0.75366 | 4.72E-07 |
| 114 | peakid_31757 | chr5  | 55354265  | 55355226  | -1.49937 | 4.82E-07 |
| 115 | peakid_40356 | chr9  | 7976196   | 7976928   | -0.72070 | 4.86E-07 |
| 116 | peakid_14782 | chr16 | 3930005   | 3931268   | 0.94936  | 5.36E-07 |
| 117 | peakid_1895  | chr1  | 100731321 | 100732180 | -0.67020 | 5.70E-07 |
| 118 | peakid_19727 | chr19 | 16652897  | 16653773  | 1.04691  | 5.67E-07 |
| 119 | peakid_20724 | chr19 | 50379803  | 50381531  | 0.69134  | 5.66E-07 |
| 120 | peakid_11305 | chr13 | 47325831  | 47326520  | -0.99964 | 5.92E-07 |
| 121 | peakid_15218 | chr16 | 30933644  | 30934938  | 0.70716  | 6.04E-07 |
| 122 | peakid_7455  | chr11 | 66233812  | 66234947  | 0.86753  | 6.24E-07 |
| 123 | peakid_20497 | chr19 | 46389028  | 46390332  | 0.97440  | 6.22E-07 |
| 124 | peakid_20246 | chr19 | 40696649  | 40697738  | 1.02702  | 6.41E-07 |

|     |              |       |           |           |          |          |
|-----|--------------|-------|-----------|-----------|----------|----------|
| 125 | peakid_22903 | chr2  | 144019533 | 144020357 | -1.01839 | 6.77E-07 |
| 126 | peakid_19716 | chr19 | 16435142  | 16436113  | 0.81186  | 6.90E-07 |
| 127 | peakid_26475 | chr22 | 39715377  | 39716064  | 1.10542  | 7.10E-07 |
| 128 | peakid_17874 | chr17 | 75136379  | 75137393  | 0.84355  | 7.19E-07 |
| 129 | peakid_32326 | chr5  | 106822070 | 106822641 | -0.99010 | 7.36E-07 |
| 130 | peakid_17093 | chr17 | 42295822  | 42296799  | 0.91418  | 7.48E-07 |
| 131 | peakid_29807 | chr4  | 26874844  | 26875488  | -0.86736 | 7.50E-07 |
| 132 | peakid_7355  | chr11 | 64851335  | 64852160  | 1.18756  | 7.56E-07 |
| 133 | peakid_11388 | chr13 | 51250726  | 51251116  | -1.47433 | 8.43E-07 |
| 134 | peakid_14689 | chr16 | 2041974   | 2042707   | 1.02655  | 8.67E-07 |
| 135 | peakid_40908 | chr9  | 84429812  | 84430390  | -1.49027 | 8.64E-07 |
| 136 | peakid_25885 | chr21 | 45431852  | 45433043  | 0.87859  | 8.86E-07 |
| 137 | peakid_1509  | chr1  | 67798686  | 67799231  | -1.17146 | 9.06E-07 |
| 138 | peakid_18846 | chr18 | 72040692  | 72041166  | -0.87208 | 9.17E-07 |
| 139 | peakid_29081 | chr3  | 177370467 | 177371143 | -1.28014 | 9.11E-07 |
| 140 | peakid_19128 | chr19 | 2950342   | 2951164   | 1.07186  | 9.25E-07 |
| 141 | peakid_15958 | chr16 | 88877739  | 88878952  | 0.93265  | 9.38E-07 |
| 142 | peakid_6597  | chr11 | 10319996  | 10320304  | -1.08175 | 9.58E-07 |
| 143 | peakid_9856  | chr12 | 68557454  | 68557792  | -1.57091 | 9.51E-07 |
| 144 | peakid_19734 | chr19 | 16738811  | 16739602  | 0.93689  | 9.66E-07 |
| 145 | peakid_39191 | chr8  | 66868026  | 66868355  | -1.35339 | 9.80E-07 |
| 146 | peakid_7472  | chr11 | 66610396  | 66611333  | 0.93506  | 9.97E-07 |
| 147 | peakid_7333  | chr11 | 64512393  | 64512956  | 1.26304  | 1.04E-06 |
| 148 | peakid_27037 | chr3  | 17192985  | 17193784  | -0.77345 | 1.05E-06 |
| 149 | peakid_26743 | chr22 | 50708494  | 50709238  | 1.15872  | 1.12E-06 |
| 150 | peakid_35745 | chr6  | 143718236 | 143719106 | -0.81288 | 1.13E-06 |
| 151 | peakid_12587 | chr14 | 69201003  | 69201582  | -1.32937 | 1.14E-06 |
| 152 | peakid_19207 | chr19 | 4342650   | 4343854   | 0.80044  | 1.21E-06 |
| 153 | peakid_39899 | chr8  | 129005079 | 129005852 | -0.84936 | 1.22E-06 |
| 154 | peakid_16340 | chr17 | 8286320   | 8287283   | 0.95021  | 1.25E-06 |
| 155 | peakid_19067 | chr19 | 1855365   | 1855788   | 1.36598  | 1.25E-06 |
| 156 | peakid_27580 | chr3  | 49711081  | 49712030  | 0.74003  | 1.27E-06 |
| 157 | peakid_32735 | chr5  | 137794980 | 137795404 | -1.07614 | 1.27E-06 |
| 158 | peakid_42569 | chrX  | 78514560  | 78515057  | -1.01563 | 1.27E-06 |
| 159 | peakid_824   | chr1  | 32109987  | 32111096  | 0.89724  | 1.32E-06 |
| 160 | peakid_16121 | chr17 | 2699396   | 2699886   | 1.49752  | 1.30E-06 |
| 161 | peakid_21554 | chr2  | 38894025  | 38894723  | -0.90295 | 1.32E-06 |
| 162 | peakid_39678 | chr8  | 116660324 | 116660912 | -0.75110 | 1.31E-06 |
| 163 | peakid_39863 | chr8  | 126954109 | 126954923 | -0.78576 | 1.35E-06 |
| 164 | peakid_18363 | chr18 | 20811244  | 20811795  | -0.76136 | 1.37E-06 |
| 165 | peakid_22939 | chr2  | 145265921 | 145266212 | -1.25932 | 1.39E-06 |
| 166 | peakid_40862 | chr9  | 79192569  | 79193144  | -1.17584 | 1.39E-06 |

|     |              |       |           |           |          |          |
|-----|--------------|-------|-----------|-----------|----------|----------|
| 167 | peakid_12515 | chr14 | 65006951  | 65007604  | -0.67921 | 1.42E-06 |
| 168 | peakid_16253 | chr17 | 7145716   | 7146634   | 1.02862  | 1.46E-06 |
| 169 | peakid_26020 | chr22 | 19434814  | 19435654  | 0.85898  | 1.48E-06 |
| 170 | peakid_36490 | chr7  | 13889631  | 13890196  | -0.78850 | 1.49E-06 |
| 171 | peakid_96    | chr1  | 2517747   | 2518684   | 0.84151  | 1.50E-06 |
| 172 | peakid_30787 | chr4  | 124398936 | 124399470 | -1.29353 | 1.55E-06 |
| 173 | peakid_26170 | chr22 | 24950812  | 24952101  | 0.71242  | 1.62E-06 |
| 174 | peakid_3329  | chr1  | 198648752 | 198649256 | -0.92254 | 1.64E-06 |
| 175 | peakid_16126 | chr17 | 2756598   | 2757285   | 1.55787  | 1.67E-06 |
| 176 | peakid_31591 | chr5  | 40675719  | 40676364  | -1.05739 | 1.67E-06 |
| 177 | peakid_7248  | chr11 | 62494378  | 62495823  | 0.76991  | 1.70E-06 |
| 178 | peakid_2657  | chr1  | 156736759 | 156737764 | 0.78342  | 1.71E-06 |
| 179 | peakid_27318 | chr3  | 39309158  | 39309818  | 1.17218  | 1.75E-06 |
| 180 | peakid_18519 | chr18 | 42309747  | 42310181  | -1.11746 | 1.83E-06 |
| 181 | peakid_3381  | chr1  | 200857303 | 200857859 | -0.92837 | 1.86E-06 |
| 182 | peakid_36825 | chr7  | 36824400  | 36824969  | -0.92959 | 1.85E-06 |
| 183 | peakid_1360  | chr1  | 58857796  | 58858277  | -1.38979 | 1.88E-06 |
| 184 | peakid_39837 | chr8  | 126010249 | 126011115 | -0.59801 | 1.87E-06 |
| 185 | peakid_38938 | chr8  | 38795797  | 38796538  | -0.77886 | 1.91E-06 |
| 186 | peakid_4114  | chr1  | 239750330 | 239750870 | -1.21622 | 2.00E-06 |
| 187 | peakid_7406  | chr11 | 65419870  | 65420740  | 0.98129  | 2.11E-06 |
| 188 | peakid_14531 | chr15 | 98503442  | 98504149  | -1.11956 | 2.12E-06 |
| 189 | peakid_9040  | chr12 | 22562223  | 22563279  | -0.66971 | 2.13E-06 |
| 190 | peakid_10201 | chr12 | 96839534  | 96840433  | -0.77880 | 2.25E-06 |
| 191 | peakid_21486 | chr2  | 36473488  | 36473942  | -1.07908 | 2.30E-06 |
| 192 | peakid_41574 | chr9  | 130922148 | 130922817 | 1.00599  | 2.30E-06 |
| 193 | peakid_20907 | chr19 | 56825784  | 56827031  | 0.94493  | 2.37E-06 |
| 194 | peakid_30646 | chr4  | 114468529 | 114469168 | -0.70781 | 2.47E-06 |
| 195 | peakid_10066 | chr12 | 92271737  | 92272058  | -1.07697 | 2.49E-06 |
| 196 | peakid_110   | chr1  | 3541049   | 3542029   | 0.82137  | 2.65E-06 |
| 197 | peakid_41647 | chr9  | 132565114 | 132566021 | 1.01954  | 2.70E-06 |
| 198 | peakid_39825 | chr8  | 125649703 | 125650308 | -0.81431 | 2.72E-06 |
| 199 | peakid_7523  | chr11 | 67572574  | 67573906  | 0.82484  | 2.76E-06 |
| 200 | peakid_42590 | chrX  | 82889918  | 82890647  | -0.72090 | 2.75E-06 |
| 201 | peakid_41695 | chr9  | 134248565 | 134249314 | 0.87730  | 2.85E-06 |
| 202 | peakid_1693  | chr1  | 89738020  | 89738954  | -0.86256 | 2.89E-06 |
| 203 | peakid_1767  | chr1  | 92781366  | 92782048  | -0.92504 | 2.91E-06 |
| 204 | peakid_1929  | chr1  | 101414804 | 101415613 | -0.86551 | 2.87E-06 |
| 205 | peakid_19058 | chr19 | 1651817   | 1653331   | 0.87280  | 2.91E-06 |
| 206 | peakid_677   | chr1  | 26946705  | 26948093  | 0.89201  | 3.03E-06 |
| 207 | peakid_31044 | chr4  | 154730336 | 154730979 | -1.19982 | 3.04E-06 |
| 208 | peakid_5045  | chr10 | 52268087  | 52268604  | -1.06918 | 3.11E-06 |

|     |              |       |           |           |          |          |
|-----|--------------|-------|-----------|-----------|----------|----------|
| 209 | peakid_30791 | chr4  | 124538102 | 124538537 | -1.11756 | 3.11E-06 |
| 210 | peakid_11331 | chr13 | 49106443  | 49107442  | -0.60381 | 3.14E-06 |
| 211 | peakid_2654  | chr1  | 156710536 | 156711391 | 0.83583  | 3.26E-06 |
| 212 | peakid_16196 | chr17 | 4851250   | 4852787   | 0.91725  | 3.30E-06 |
| 213 | peakid_14658 | chr16 | 1358756   | 1359966   | 0.88503  | 3.42E-06 |
| 214 | peakid_4296  | chr10 | 4276802   | 4277383   | -1.04665 | 3.54E-06 |
| 215 | peakid_7440  | chr11 | 66034886  | 66036312  | 0.77842  | 3.59E-06 |
| 216 | peakid_20121 | chr19 | 36705232  | 36706274  | 0.88749  | 3.58E-06 |
| 217 | peakid_21062 | chr2  | 7865433   | 7866120   | -0.96594 | 3.65E-06 |
| 218 | peakid_14714 | chr16 | 2563439   | 2564510   | 0.87742  | 3.83E-06 |
| 219 | peakid_23535 | chr2  | 191980106 | 191980900 | -0.92494 | 3.82E-06 |
| 220 | peakid_29203 | chr3  | 185826744 | 185827412 | -0.72809 | 3.84E-06 |
| 221 | peakid_14160 | chr15 | 75074161  | 75074984  | 0.93536  | 3.87E-06 |
| 222 | peakid_2641  | chr1  | 156474692 | 156475437 | 0.91658  | 3.91E-06 |
| 223 | peakid_9858  | chr12 | 68574814  | 68575449  | -1.22183 | 4.06E-06 |
| 224 | peakid_24381 | chr2  | 242576024 | 242577461 | 0.92667  | 4.06E-06 |
| 225 | peakid_795   | chr1  | 31190782  | 31191951  | 0.64083  | 4.11E-06 |
| 226 | peakid_11059 | chr13 | 31318333  | 31318933  | -0.75150 | 4.12E-06 |
| 227 | peakid_2875  | chr1  | 167486768 | 167487261 | -0.95955 | 4.19E-06 |
| 228 | peakid_20142 | chr19 | 37808234  | 37809129  | 0.87119  | 4.21E-06 |
| 229 | peakid_35038 | chr6  | 105906959 | 105907459 | -1.13051 | 4.22E-06 |
| 230 | peakid_12415 | chr14 | 60618490  | 60618893  | -0.98535 | 4.34E-06 |
| 231 | peakid_29875 | chr4  | 38655970  | 38656328  | 1.49837  | 4.44E-06 |
| 232 | peakid_19349 | chr19 | 7985008   | 7986098   | 0.89241  | 4.50E-06 |
| 233 | peakid_20131 | chr19 | 37263459  | 37264250  | 1.21078  | 4.49E-06 |
| 234 | peakid_26412 | chr22 | 38141842  | 38142552  | 0.90920  | 4.56E-06 |
| 235 | peakid_14726 | chr16 | 2826842   | 2827751   | 1.04018  | 4.62E-06 |
| 236 | peakid_21514 | chr2  | 37571667  | 37572555  | -0.85303 | 4.66E-06 |
| 237 | peakid_1948  | chr1  | 101774853 | 101775900 | -0.61269 | 4.72E-06 |
| 238 | peakid_20975 | chr19 | 58986959  | 58987879  | 0.76856  | 4.72E-06 |
| 239 | peakid_19470 | chr19 | 10981466  | 10982600  | 0.68656  | 4.81E-06 |
| 240 | peakid_41835 | chr9  | 139304795 | 139305332 | 1.11391  | 4.82E-06 |
| 241 | peakid_19473 | chr19 | 11071146  | 11072133  | 0.85005  | 4.96E-06 |
| 242 | peakid_35379 | chr6  | 128293020 | 128293731 | -0.80111 | 4.95E-06 |
| 243 | peakid_20849 | chr19 | 54640650  | 54641658  | 0.63245  | 5.04E-06 |
| 244 | peakid_775   | chr1  | 28994974  | 28995829  | 0.99560  | 5.17E-06 |
| 245 | peakid_10337 | chr12 | 107421362 | 107421854 | -1.37637 | 5.14E-06 |
| 246 | peakid_15202 | chr16 | 30669139  | 30670825  | 0.62990  | 5.09E-06 |
| 247 | peakid_26042 | chr22 | 20104472  | 20105412  | 0.85350  | 5.11E-06 |
| 248 | peakid_29479 | chr4  | 1241882   | 1243503   | 0.72866  | 5.16E-06 |
| 249 | peakid_39102 | chr8  | 59703319  | 59704000  | -1.12708 | 5.24E-06 |
| 250 | peakid_22925 | chr2  | 145140432 | 145140970 | -0.85789 | 5.34E-06 |

|     |              |       |           |           |          |          |
|-----|--------------|-------|-----------|-----------|----------|----------|
| 251 | peakid_1320  | chr1  | 54411054  | 54412403  | 0.63236  | 5.37E-06 |
| 252 | peakid_32325 | chr5  | 106812461 | 106813002 | -1.00513 | 5.51E-06 |
| 253 | peakid_9281  | chr12 | 46608844  | 46609325  | -0.87153 | 5.57E-06 |
| 254 | peakid_18019 | chr17 | 79481678  | 79482245  | 0.97086  | 5.68E-06 |
| 255 | peakid_20344 | chr19 | 42746539  | 42747604  | 0.67577  | 5.67E-06 |
| 256 | peakid_20693 | chr19 | 50003945  | 50004694  | 0.85039  | 5.80E-06 |
| 257 | peakid_2984  | chr1  | 172639623 | 172640325 | -0.95779 | 5.94E-06 |
| 258 | peakid_11158 | chr13 | 41059760  | 41060373  | -0.68208 | 6.05E-06 |
| 259 | peakid_20115 | chr19 | 36544845  | 36546029  | 0.73541  | 6.06E-06 |
| 260 | peakid_30769 | chr4  | 123653350 | 123654238 | -0.49774 | 6.05E-06 |
| 261 | peakid_3335  | chr1  | 198757715 | 198758211 | -1.16362 | 6.15E-06 |
| 262 | peakid_6364  | chr11 | 694833    | 696165    | 0.60543  | 6.17E-06 |
| 263 | peakid_34307 | chr6  | 33538620  | 33539429  | 0.82644  | 6.17E-06 |
| 264 | peakid_28107 | chr3  | 105787561 | 105788051 | -1.20484 | 6.30E-06 |
| 265 | peakid_20705 | chr19 | 50094333  | 50094877  | 1.18120  | 6.42E-06 |
| 266 | peakid_21530 | chr2  | 37875639  | 37876167  | -1.09643 | 6.49E-06 |
| 267 | peakid_35025 | chr6  | 102293540 | 102293985 | -1.17970 | 6.50E-06 |
| 268 | peakid_19068 | chr19 | 1863466   | 1864545   | 0.68300  | 6.55E-06 |
| 269 | peakid_20072 | chr19 | 35759316  | 35759959  | 1.24331  | 6.58E-06 |
| 270 | peakid_26467 | chr22 | 39541382  | 39542244  | 0.93812  | 6.72E-06 |
| 271 | peakid_27166 | chr3  | 30686085  | 30686617  | -0.99589 | 6.71E-06 |
| 272 | peakid_7252  | chr11 | 62538545  | 62539408  | 0.93778  | 6.75E-06 |
| 273 | peakid_4789  | chr10 | 30315901  | 30316705  | -0.62003 | 6.81E-06 |
| 274 | peakid_58    | chr1  | 1709691   | 1710716   | 0.87266  | 6.92E-06 |
| 275 | peakid_7430  | chr11 | 65769547  | 65770435  | 0.85168  | 6.90E-06 |
| 276 | peakid_7826  | chr11 | 86511215  | 86511835  | 1.31656  | 7.04E-06 |
| 277 | peakid_66    | chr1  | 1981406   | 1982274   | 0.80600  | 7.21E-06 |
| 278 | peakid_2981  | chr1  | 172616152 | 172616709 | -1.11488 | 7.32E-06 |
| 279 | peakid_182   | chr1  | 6844430   | 6846143   | 0.56767  | 7.52E-06 |
| 280 | peakid_16182 | chr17 | 4613311   | 4614227   | 0.70101  | 7.51E-06 |
| 281 | peakid_34214 | chr6  | 31633276  | 31634016  | 0.87629  | 7.55E-06 |
| 282 | peakid_8324  | chr11 | 122619756 | 122620036 | -1.35303 | 7.80E-06 |
| 283 | peakid_29866 | chr4  | 38312054  | 38312597  | -0.73614 | 7.81E-06 |
| 284 | peakid_5595  | chr10 | 90923244  | 90923988  | -0.90521 | 7.87E-06 |
| 285 | peakid_11291 | chr13 | 46869729  | 46870709  | -0.66274 | 8.03E-06 |
| 286 | peakid_9864  | chr12 | 68683953  | 68684426  | -1.24671 | 8.09E-06 |
| 287 | peakid_30302 | chr4  | 83826539  | 83826776  | -1.36961 | 8.35E-06 |
| 288 | peakid_27741 | chr3  | 58101840  | 58102324  | 1.35559  | 8.46E-06 |
| 289 | peakid_26308 | chr22 | 32366578  | 32367066  | 1.16425  | 8.57E-06 |
| 290 | peakid_9853  | chr12 | 68513511  | 68514132  | -1.02269 | 8.66E-06 |
| 291 | peakid_7425  | chr11 | 65686233  | 65687504  | 0.74732  | 8.84E-06 |
| 292 | peakid_4969  | chr10 | 44806005  | 44806898  | -0.87825 | 8.90E-06 |

|     |              |       |           |           |          |          |
|-----|--------------|-------|-----------|-----------|----------|----------|
| 293 | peakid_14772 | chr16 | 3507567   | 3508412   | 0.89881  | 8.94E-06 |
| 294 | peakid_23600 | chr2  | 197075881 | 197076622 | -0.81727 | 9.00E-06 |
| 295 | peakid_28165 | chr3  | 108554003 | 108554374 | -0.98400 | 8.97E-06 |
| 296 | peakid_26021 | chr22 | 19466576  | 19467590  | 0.75905  | 9.07E-06 |
| 297 | peakid_489   | chr1  | 21112834  | 21114173  | 0.72659  | 9.14E-06 |
| 298 | peakid_18039 | chr17 | 79934967  | 79936020  | 0.90716  | 9.20E-06 |
| 299 | peakid_16458 | chr17 | 17267004  | 17267468  | 1.44418  | 9.38E-06 |
| 300 | peakid_17846 | chr17 | 74497077  | 74497865  | 0.89655  | 9.60E-06 |
| 301 | peakid_12176 | chr14 | 39698238  | 39698884  | -0.81833 | 9.70E-06 |
| 302 | peakid_41573 | chr9  | 130889736 | 130890995 | 0.76193  | 9.98E-06 |
| 303 | peakid_10071 | chr12 | 92424304  | 92424922  | -0.80797 | 1.01E-05 |
| 304 | peakid_28206 | chr3  | 111393010 | 111393922 | -0.53508 | 1.01E-05 |
| 305 | peakid_1149  | chr1  | 44678932  | 44679528  | 1.18971  | 1.04E-05 |
| 306 | peakid_30790 | chr4  | 124520988 | 124521562 | -0.96744 | 1.05E-05 |
| 307 | peakid_8830  | chr12 | 10059459  | 10059926  | -1.08361 | 1.05E-05 |
| 308 | peakid_10063 | chr12 | 92245945  | 92246294  | -1.34595 | 1.06E-05 |
| 309 | peakid_24866 | chr20 | 32580839  | 32582139  | 0.67611  | 1.07E-05 |
| 310 | peakid_6672  | chr11 | 13689605  | 13690840  | -0.52004 | 1.08E-05 |
| 311 | peakid_6692  | chr11 | 14402531  | 14403160  | -1.08225 | 1.08E-05 |
| 312 | peakid_25430 | chr20 | 62289571  | 62290198  | 1.08619  | 1.09E-05 |
| 313 | peakid_26016 | chr22 | 19165777  | 19166723  | 0.81337  | 1.10E-05 |
| 314 | peakid_121   | chr1  | 3816426   | 3817783   | 0.66611  | 1.14E-05 |
| 315 | peakid_1894  | chr1  | 100714846 | 100715782 | -0.57425 | 1.15E-05 |
| 316 | peakid_7921  | chr11 | 95890100  | 95890772  | -1.05628 | 1.14E-05 |
| 317 | peakid_15171 | chr16 | 30194573  | 30195866  | 0.92462  | 1.13E-05 |
| 318 | peakid_26600 | chr22 | 43044924  | 43045861  | 0.92429  | 1.15E-05 |
| 319 | peakid_20431 | chr19 | 45542058  | 45542920  | 0.99820  | 1.17E-05 |
| 320 | peakid_7242  | chr11 | 62432247  | 62433071  | 0.92863  | 1.17E-05 |
| 321 | peakid_11329 | chr13 | 49079249  | 49080204  | -0.93969 | 1.18E-05 |
| 322 | peakid_15117 | chr16 | 28833899  | 28834738  | 0.87499  | 1.19E-05 |
| 323 | peakid_20291 | chr19 | 41768914  | 41770462  | 0.63440  | 1.19E-05 |
| 324 | peakid_33804 | chr6  | 16320063  | 16320724  | -0.91353 | 1.23E-05 |
| 325 | peakid_7256  | chr11 | 62598967  | 62599916  | 0.74277  | 1.24E-05 |
| 326 | peakid_4412  | chr10 | 8374064   | 8374828   | -0.66869 | 1.25E-05 |
| 327 | peakid_14681 | chr16 | 1876161   | 1877415   | 0.80555  | 1.26E-05 |
| 328 | peakid_20971 | chr19 | 58919611  | 58920413  | 0.86883  | 1.25E-05 |
| 329 | peakid_23073 | chr2  | 160001673 | 160002201 | -1.19156 | 1.26E-05 |
| 330 | peakid_41785 | chr9  | 136932671 | 136933976 | 0.80110  | 1.26E-05 |
| 331 | peakid_18067 | chr17 | 80408390  | 80408983  | 0.97048  | 1.27E-05 |
| 332 | peakid_2983  | chr1  | 172631718 | 172632367 | -0.75815 | 1.29E-05 |
| 333 | peakid_11585 | chr13 | 84660052  | 84661224  | -0.81537 | 1.30E-05 |
| 334 | peakid_39984 | chr8  | 134151061 | 134151596 | -0.93544 | 1.32E-05 |

|     |              |       |           |           |          |          |
|-----|--------------|-------|-----------|-----------|----------|----------|
| 335 | peakid_7516  | chr11 | 67396834  | 67398408  | 0.74956  | 1.33E-05 |
| 336 | peakid_9547  | chr12 | 53773148  | 53774747  | 0.56404  | 1.34E-05 |
| 337 | peakid_14691 | chr16 | 2059435   | 2060115   | 0.97447  | 1.35E-05 |
| 338 | peakid_14822 | chr16 | 4783910   | 4785196   | 0.83223  | 1.34E-05 |
| 339 | peakid_16216 | chr17 | 5389282   | 5390356   | 0.82945  | 1.35E-05 |
| 340 | peakid_40176 | chr8  | 145159076 | 145160032 | 0.71898  | 1.34E-05 |
| 341 | peakid_1560  | chr1  | 77747428  | 77748398  | 1.26621  | 1.36E-05 |
| 342 | peakid_41746 | chr9  | 135996322 | 135997118 | 0.85451  | 1.38E-05 |
| 343 | peakid_21595 | chr2  | 42360037  | 42360784  | -0.69493 | 1.39E-05 |
| 344 | peakid_38037 | chr7  | 138560464 | 138561065 | -0.86467 | 1.40E-05 |
| 345 | peakid_16982 | chr17 | 39844683  | 39845970  | 0.66768  | 1.43E-05 |
| 346 | peakid_10151 | chr12 | 94638469  | 94639066  | -0.97950 | 1.45E-05 |
| 347 | peakid_28336 | chr3  | 118753176 | 118754079 | -0.93215 | 1.45E-05 |
| 348 | peakid_7254  | chr11 | 62559226  | 62559754  | 1.08904  | 1.47E-05 |
| 349 | peakid_19622 | chr19 | 14116505  | 14117939  | 0.69277  | 1.49E-05 |
| 350 | peakid_14725 | chr16 | 2802076   | 2803168   | 0.81461  | 1.49E-05 |
| 351 | peakid_7237  | chr11 | 62379669  | 62380847  | 0.75361  | 1.50E-05 |
| 352 | peakid_7999  | chr11 | 104576260 | 104577013 | -0.61125 | 1.53E-05 |
| 353 | peakid_26039 | chr22 | 20067287  | 20068305  | 0.82921  | 1.54E-05 |
| 354 | peakid_34936 | chr6  | 90662145  | 90663000  | -0.75721 | 1.55E-05 |
| 355 | peakid_7360  | chr11 | 64884911  | 64885552  | 0.82541  | 1.55E-05 |
| 356 | peakid_41818 | chr9  | 138799099 | 138800030 | 0.73485  | 1.57E-05 |
| 357 | peakid_37326 | chr7  | 87228722  | 87229051  | -1.21624 | 1.60E-05 |
| 358 | peakid_22807 | chr2  | 133033282 | 133033653 | -0.98616 | 1.62E-05 |
| 359 | peakid_2982  | chr1  | 172628062 | 172628473 | -1.06074 | 1.64E-05 |
| 360 | peakid_15237 | chr16 | 31190941  | 31192310  | 0.85673  | 1.63E-05 |
| 361 | peakid_15772 | chr16 | 81557992  | 81558433  | -1.08621 | 1.63E-05 |
| 362 | peakid_18138 | chr18 | 2963155   | 2963458   | -1.16657 | 1.64E-05 |
| 363 | peakid_20426 | chr19 | 45457962  | 45458899  | 0.91446  | 1.63E-05 |
| 364 | peakid_367   | chr1  | 15852977  | 15853657  | 0.75867  | 1.72E-05 |
| 365 | peakid_16006 | chr16 | 89789069  | 89789446  | 1.20029  | 1.73E-05 |
| 366 | peakid_17783 | chr17 | 73401443  | 73402141  | 0.97162  | 1.74E-05 |
| 367 | peakid_5581  | chr10 | 90595245  | 90595815  | -0.75370 | 1.75E-05 |
| 368 | peakid_19184 | chr19 | 3970858   | 3971540   | 0.96825  | 1.76E-05 |
| 369 | peakid_40134 | chr8  | 144650807 | 144651873 | 0.79076  | 1.76E-05 |
| 370 | peakid_20319 | chr19 | 42363565  | 42364574  | 0.78076  | 1.77E-05 |
| 371 | peakid_11223 | chr13 | 42979884  | 42980923  | -0.85520 | 1.78E-05 |
| 372 | peakid_34    | chr1  | 1209013   | 1209779   | 0.92203  | 1.80E-05 |
| 373 | peakid_5599  | chr10 | 91011156  | 91012094  | -0.52758 | 1.80E-05 |
| 374 | peakid_18368 | chr18 | 20886866  | 20887281  | -1.17494 | 1.83E-05 |
| 375 | peakid_15974 | chr16 | 89283794  | 89284356  | 1.08089  | 1.83E-05 |
| 376 | peakid_15163 | chr16 | 30006577  | 30007782  | 0.81606  | 1.87E-05 |

|     |              |       |           |           |          |          |
|-----|--------------|-------|-----------|-----------|----------|----------|
| 377 | peakid_6377  | chr11 | 805047    | 805630    | 0.99589  | 1.88E-05 |
| 378 | peakid_7235  | chr11 | 62368760  | 62369749  | 0.77324  | 1.88E-05 |
| 379 | peakid_15234 | chr16 | 31153410  | 31154295  | 0.68536  | 1.89E-05 |
| 380 | peakid_27193 | chr3  | 32155841  | 32156909  | -0.65549 | 1.90E-05 |
| 381 | peakid_20403 | chr19 | 44617297  | 44617823  | 1.04006  | 1.93E-05 |
| 382 | peakid_29980 | chr4  | 47533442  | 47534173  | -0.76142 | 1.93E-05 |
| 383 | peakid_4276  | chr10 | 3847464   | 3847813   | -1.02675 | 1.94E-05 |
| 384 | peakid_11353 | chr13 | 50017908  | 50018822  | -0.50966 | 2.01E-05 |
| 385 | peakid_26715 | chr22 | 50311665  | 50312558  | 0.79374  | 2.02E-05 |
| 386 | peakid_20029 | chr19 | 34760862  | 34761542  | 1.29003  | 2.02E-05 |
| 387 | peakid_5164  | chr10 | 64615909  | 64616268  | -1.29751 | 2.04E-05 |
| 388 | peakid_7317  | chr11 | 64072404  | 64073318  | 0.70339  | 2.03E-05 |
| 389 | peakid_14832 | chr16 | 5147557   | 5148841   | 0.68244  | 2.06E-05 |
| 390 | peakid_20687 | chr19 | 49972227  | 49972831  | 0.92571  | 2.08E-05 |
| 391 | peakid_19342 | chr19 | 7894361   | 7895341   | 0.65469  | 2.09E-05 |
| 392 | peakid_7576  | chr11 | 71497618  | 71498804  | 0.66633  | 2.10E-05 |
| 393 | peakid_3302  | chr1  | 198157126 | 198157849 | -0.74475 | 2.11E-05 |
| 394 | peakid_14621 | chr16 | 577095    | 578024    | 0.71996  | 2.12E-05 |
| 395 | peakid_7946  | chr11 | 101785420 | 101786288 | -0.50498 | 2.13E-05 |
| 396 | peakid_26443 | chr22 | 38966001  | 38966729  | 0.92620  | 2.14E-05 |
| 397 | peakid_35    | chr1  | 1243127   | 1244273   | 0.72700  | 2.16E-05 |
| 398 | peakid_19279 | chr19 | 6393076   | 6393984   | 0.87030  | 2.16E-05 |
| 399 | peakid_28249 | chr3  | 112362611 | 112363399 | -1.07551 | 2.15E-05 |
| 400 | peakid_34294 | chr6  | 33285310  | 33286089  | 0.89864  | 2.16E-05 |
| 401 | peakid_19191 | chr19 | 4065223   | 4066245   | 0.73384  | 2.19E-05 |
| 402 | peakid_32280 | chr5  | 100003042 | 100003468 | -1.18038 | 2.21E-05 |
| 403 | peakid_27055 | chr3  | 18486124  | 18487386  | -0.56441 | 2.22E-05 |
| 404 | peakid_29830 | chr4  | 36280470  | 36280811  | -1.33094 | 2.24E-05 |
| 405 | peakid_40793 | chr9  | 74397916  | 74398642  | -0.64569 | 2.24E-05 |
| 406 | peakid_20743 | chr19 | 50887070  | 50887836  | 0.83549  | 2.25E-05 |
| 407 | peakid_1776  | chr1  | 92950132  | 92950594  | -0.80355 | 2.28E-05 |
| 408 | peakid_2287  | chr1  | 144935433 | 144935793 | -0.90093 | 2.29E-05 |
| 409 | peakid_10079 | chr12 | 92539116  | 92540371  | -0.47289 | 2.29E-05 |
| 410 | peakid_31881 | chr5  | 67535302  | 67535913  | -0.80181 | 2.29E-05 |
| 411 | peakid_26749 | chr22 | 50781263  | 50781990  | 0.89494  | 2.32E-05 |
| 412 | peakid_3313  | chr1  | 198533637 | 198534285 | -1.10424 | 2.33E-05 |
| 413 | peakid_18159 | chr18 | 3297040   | 3297827   | -0.74034 | 2.36E-05 |
| 414 | peakid_20333 | chr19 | 42497891  | 42498710  | 1.07396  | 2.36E-05 |
| 415 | peakid_26540 | chr22 | 41777157  | 41778448  | 0.67355  | 2.35E-05 |
| 416 | peakid_16110 | chr17 | 2295784   | 2297479   | 0.62387  | 2.39E-05 |
| 417 | peakid_39669 | chr8  | 116230838 | 116231651 | -0.55095 | 2.38E-05 |
| 418 | peakid_11716 | chr13 | 100086474 | 100087181 | -0.62924 | 2.40E-05 |



|     |              |       |           |           |          |          |
|-----|--------------|-------|-----------|-----------|----------|----------|
| 419 | peakid_19275 | chr19 | 6279723   | 6280477   | 0.80184  | 2.41E-05 |
| 420 | peakid_17657 | chr17 | 65821296  | 65822480  | 0.78527  | 2.50E-05 |
| 421 | peakid_20874 | chr19 | 55769883  | 55770982  | 0.78279  | 2.52E-05 |
| 422 | peakid_23438 | chr2  | 182321332 | 182322308 | -0.69198 | 2.53E-05 |
| 423 | peakid_21672 | chr2  | 46666710  | 46667172  | -1.05812 | 2.55E-05 |
| 424 | peakid_29254 | chr3  | 187520777 | 187521073 | -1.27630 | 2.56E-05 |
| 425 | peakid_29501 | chr4  | 1872034   | 1873472   | 0.71780  | 2.58E-05 |
| 426 | peakid_10950 | chr13 | 26475813  | 26476222  | -0.90855 | 2.63E-05 |
| 427 | peakid_39978 | chr8  | 134080748 | 134081185 | -0.86974 | 2.64E-05 |
| 428 | peakid_19146 | chr19 | 3185274   | 3186375   | 0.84538  | 2.65E-05 |
| 429 | peakid_25930 | chr21 | 46644322  | 46644861  | 1.16444  | 2.66E-05 |
| 430 | peakid_39848 | chr8  | 126540961 | 126541565 | -0.78851 | 2.67E-05 |
| 431 | peakid_19410 | chr19 | 10196668  | 10197205  | 0.90060  | 2.69E-05 |
| 432 | peakid_35256 | chr6  | 117803389 | 117804286 | -0.59751 | 2.70E-05 |
| 433 | peakid_39871 | chr8  | 127568704 | 127569264 | -0.82869 | 2.73E-05 |
| 434 | peakid_2653  | chr1  | 156697957 | 156699028 | 0.72011  | 2.77E-05 |
| 435 | peakid_176   | chr1  | 6673186   | 6674090   | 0.64829  | 2.80E-05 |
| 436 | peakid_6047  | chr10 | 115802962 | 115803995 | -0.96622 | 2.79E-05 |
| 437 | peakid_12087 | chr14 | 31596947  | 31597376  | -0.98013 | 2.80E-05 |
| 438 | peakid_14676 | chr16 | 1755758   | 1756618   | 0.87479  | 2.80E-05 |
| 439 | peakid_15126 | chr16 | 28961787  | 28962540  | 0.74217  | 2.89E-05 |
| 440 | peakid_31565 | chr5  | 40361609  | 40361893  | -1.16258 | 2.89E-05 |
| 441 | peakid_7314  | chr11 | 64051985  | 64053551  | 0.70721  | 2.91E-05 |
| 442 | peakid_25070 | chr20 | 43513895  | 43514870  | 0.68186  | 2.90E-05 |
| 443 | peakid_3262  | chr1  | 194258630 | 194259190 | -0.82010 | 2.93E-05 |
| 444 | peakid_1783  | chr1  | 93050052  | 93050368  | -1.16305 | 2.93E-05 |
| 445 | peakid_31713 | chr5  | 54039875  | 54040625  | -0.85406 | 2.95E-05 |
| 446 | peakid_2656  | chr1  | 156721073 | 156721962 | 0.83049  | 2.97E-05 |
| 447 | peakid_1713  | chr1  | 90098140  | 90099285  | -0.56779 | 2.99E-05 |
| 448 | peakid_18030 | chr17 | 79828761  | 79829732  | 0.87674  | 2.98E-05 |
| 449 | peakid_27578 | chr3  | 49591547  | 49592388  | 0.89137  | 3.03E-05 |
| 450 | peakid_9879  | chr12 | 69004208  | 69005229  | -0.64458 | 3.07E-05 |
| 451 | peakid_12318 | chr14 | 53385083  | 53385678  | -0.89326 | 3.14E-05 |
| 452 | peakid_40181 | chr8  | 145514859 | 145515537 | 0.83865  | 3.14E-05 |
| 453 | peakid_840   | chr1  | 32403175  | 32404423  | 0.69412  | 3.16E-05 |
| 454 | peakid_18975 | chr19 | 610622    | 611584    | 1.07259  | 3.23E-05 |
| 455 | peakid_20764 | chr19 | 51611429  | 51612134  | 0.84857  | 3.26E-05 |
| 456 | peakid_20093 | chr19 | 36207787  | 36209165  | 0.64930  | 3.28E-05 |
| 457 | peakid_81    | chr1  | 2246027   | 2246967   | 0.92322  | 3.32E-05 |
| 458 | peakid_15203 | chr16 | 30709254  | 30710586  | 0.69501  | 3.34E-05 |
| 459 | peakid_7362  | chr11 | 64901816  | 64902840  | 0.83916  | 3.34E-05 |
| 460 | peakid_13439 | chr15 | 31657920  | 31658460  | -0.80056 | 3.36E-05 |

|     |              |       |           |           |          |          |
|-----|--------------|-------|-----------|-----------|----------|----------|
| 461 | peakid_36448 | chr7  | 8165351   | 8166148   | -0.62300 | 3.39E-05 |
| 462 | peakid_39965 | chr8  | 133772529 | 133773250 | -0.85531 | 3.43E-05 |
| 463 | peakid_28837 | chr3  | 152016645 | 152017452 | -0.81555 | 3.44E-05 |
| 464 | peakid_12844 | chr14 | 88461448  | 88461777  | -1.02217 | 3.46E-05 |
| 465 | peakid_13798 | chr15 | 55513436  | 55514231  | -1.00148 | 3.46E-05 |
| 466 | peakid_2089  | chr1  | 111991227 | 111992320 | 0.77567  | 3.48E-05 |
| 467 | peakid_30724 | chr4  | 122148532 | 122149081 | -0.93279 | 3.47E-05 |
| 468 | peakid_2505  | chr1  | 153918185 | 153919431 | 0.79745  | 3.49E-05 |
| 469 | peakid_32425 | chr5  | 114505218 | 114506201 | -0.63655 | 3.49E-05 |
| 470 | peakid_35051 | chr6  | 106533855 | 106534489 | -0.75489 | 3.53E-05 |
| 471 | peakid_16331 | chr17 | 8113675   | 8114262   | 1.15987  | 3.56E-05 |
| 472 | peakid_16613 | chr17 | 26988664  | 26989529  | 0.87095  | 3.58E-05 |
| 473 | peakid_17754 | chr17 | 72868907  | 72869774  | 0.73966  | 3.58E-05 |
| 474 | peakid_22716 | chr2  | 122456897 | 122457637 | -0.70627 | 3.57E-05 |
| 475 | peakid_31945 | chr5  | 72608370  | 72608772  | -1.08866 | 3.58E-05 |
| 476 | peakid_37366 | chr7  | 92033195  | 92033906  | -1.14699 | 3.57E-05 |
| 477 | peakid_12223 | chr14 | 50465961  | 50466339  | -0.85628 | 3.63E-05 |
| 478 | peakid_15939 | chr16 | 88636348  | 88637234  | 0.89615  | 3.64E-05 |
| 479 | peakid_19871 | chr19 | 19431111  | 19431916  | 0.74883  | 3.64E-05 |
| 480 | peakid_19434 | chr19 | 10491042  | 10491757  | 0.75593  | 3.66E-05 |
| 481 | peakid_29062 | chr3  | 176917062 | 176917397 | -0.98448 | 3.71E-05 |
| 482 | peakid_12437 | chr14 | 61746964  | 61748256  | -0.67175 | 3.73E-05 |
| 483 | peakid_23544 | chr2  | 192071272 | 192071965 | -0.71255 | 3.77E-05 |
| 484 | peakid_17168 | chr17 | 44270156  | 44271778  | 0.72678  | 3.82E-05 |
| 485 | peakid_14675 | chr16 | 1727930   | 1728683   | 0.76605  | 3.84E-05 |
| 486 | peakid_19105 | chr19 | 2475725   | 2476264   | 1.01335  | 3.84E-05 |
| 487 | peakid_41541 | chr9  | 130547356 | 130548542 | 0.66511  | 3.84E-05 |
| 488 | peakid_27822 | chr3  | 66633058  | 66633696  | -0.80498 | 3.94E-05 |
| 489 | peakid_16285 | chr17 | 7517765   | 7518890   | 0.63023  | 3.99E-05 |
| 490 | peakid_15622 | chr16 | 70414877  | 70415792  | 0.70164  | 4.01E-05 |
| 491 | peakid_8441  | chr11 | 128194098 | 128195114 | -0.71247 | 4.02E-05 |
| 492 | peakid_14995 | chr16 | 21512748  | 21514065  | 0.56580  | 4.09E-05 |
| 493 | peakid_15159 | chr16 | 29911280  | 29912016  | 1.09075  | 4.10E-05 |
| 494 | peakid_9950  | chr12 | 75874372  | 75874911  | -0.65318 | 4.16E-05 |
| 495 | peakid_26248 | chr22 | 30162730  | 30163638  | 0.74997  | 4.20E-05 |
| 496 | peakid_41612 | chr9  | 131872818 | 131873890 | 0.72422  | 4.21E-05 |
| 497 | peakid_20733 | chr19 | 50528375  | 50529535  | 0.71484  | 4.24E-05 |
| 498 | peakid_25399 | chr20 | 61568809  | 61569967  | 0.74302  | 4.23E-05 |
| 499 | peakid_7305  | chr11 | 63993316  | 63993973  | 0.97043  | 4.31E-05 |
| 500 | peakid_11576 | chr13 | 81052139  | 81052637  | -1.21496 | 4.31E-05 |

**Table S4, related to Figure 8.****List of top 200 significant genes up-/downregulated from scRNA-seq**

| Gene name  | Log FC:<br>(LN/Blood) | P-value  |
|------------|-----------------------|----------|
| TUBAP2     | 0.649504              | 0.000014 |
| CFL1P2     | -0.652373             | 0.000017 |
| CD3D       | 0.60613               | 0.000046 |
| HLA-DPB1   | -0.610531             | 0.000053 |
| HLA-E      | -0.577799             | 0.000127 |
| ANKLE2     | 0.546936              | 0.000223 |
| CFL1       | -0.549949             | 0.000259 |
| FTH1       | -0.544579             | 0.000297 |
| AC022210.1 | -0.54436              | 0.000299 |
| TUBA1B     | 0.534247              | 0.000316 |
| AC006483.1 | 0.530684              | 0.000347 |
| IL32       | 0.529765              | 0.000356 |
| LGALS1     | 0.506563              | 0.000638 |
| TCEA1      | -0.513658             | 0.00064  |
| LMAN2      | -0.512158             | 0.000664 |
| C16orf54   | -0.498763             | 0.000928 |
| NOA1       | 0.488268              | 0.001015 |
| PIP4K2A    | -0.491602             | 0.001101 |
| COX7A2L    | -0.491267             | 0.00111  |
| S100A11    | 0.484015              | 0.001128 |
| CD8B       | -0.486164             | 0.001249 |
| MRPL52     | -0.483101             | 0.001345 |
| PHF3       | -0.482516             | 0.001363 |
| YIF1A      | 0.472704              | 0.001482 |
| HDAC4      | -0.473711             | 0.001678 |
| SECISBP2   | -0.469252             | 0.001859 |
| CA5B       | -0.46786              | 0.00192  |
| AC005840.1 | -0.461978             | 0.002202 |
| CST7       | -0.45949              | 0.002332 |
| HNRNPA3P5  | 0.452534              | 0.002397 |
| BHLHE40    | -0.457094             | 0.002457 |
| RPL30      | -0.454698             | 0.002592 |
| AF111169.1 | -0.450351             | 0.002875 |
| H3F3C      | 0.443112              | 0.002994 |
| PRPF40A    | -0.447788             | 0.003052 |
| SOAT1      | -0.443248             | 0.003383 |
| C1orf174   | -0.438552             | 0.003761 |
| DENND2D    | -0.436145             | 0.003967 |

|            |           |          |
|------------|-----------|----------|
| UBC        | 0.429209  | 0.004124 |
| RARRES3    | -0.434219 | 0.004139 |
| ATP6V1G1   | -0.433918 | 0.004165 |
| SPPL2A     | -0.432567 | 0.00429  |
| NSA2       | -0.431998 | 0.004355 |
| TRAF3IP3   | -0.430648 | 0.004508 |
| EIF3E      | -0.429584 | 0.004615 |
| ITSN2      | -0.429546 | 0.00462  |
| TRBV5-4    | 0.424132  | 0.004658 |
| NEIL2      | -0.425758 | 0.005029 |
| PUM2       | -0.425562 | 0.005048 |
| RPS20P14   | -0.424577 | 0.005162 |
| HAUS1      | -0.423996 | 0.005223 |
| DUSP1      | -0.421739 | 0.00549  |
| OTUD7B     | -0.421546 | 0.005512 |
| SLC41A2    | 0.416575  | 0.005525 |
| ELMSAN1    | 0.416422  | 0.005545 |
| XPO4       | 0.416014  | 0.0056   |
| RPL27A     | -0.420202 | 0.005681 |
| TRBV5-3    | 0.413615  | 0.005911 |
| KMT2A      | -0.418024 | 0.005966 |
| ABCD4      | -0.415755 | 0.006278 |
| ENOX2      | 0.409979  | 0.006423 |
| LINC00649  | 0.409374  | 0.006508 |
| NFKBIB     | 0.408637  | 0.006615 |
| MYO1G      | 0.406597  | 0.006927 |
| CPSF1      | -0.408685 | 0.007313 |
| DDX5       | 0.403803  | 0.007369 |
| AC245595.1 | -0.406289 | 0.007709 |
| USP48      | -0.405684 | 0.007809 |
| SRSF6      | 0.399556  | 0.00808  |
| DPP6       | -0.402798 | 0.008294 |
| MRPL10     | -0.40232  | 0.008377 |
| RPL3P4     | -0.402044 | 0.008434 |
| SCMH1      | 0.396677  | 0.008605 |
| SNRPGP10   | 0.396611  | 0.008618 |
| RPSAP8     | 0.39638   | 0.008659 |
| EVI2A      | -0.398966 | 0.008985 |
| LCP2       | -0.397969 | 0.009203 |
| AP001086.1 | 0.393541  | 0.00923  |
| CDK5RAP2   | -0.396647 | 0.009474 |
| LSP1       | -0.396429 | 0.009517 |

|            |           |          |
|------------|-----------|----------|
| RSL1D1     | 0.391656  | 0.009614 |
| TRBV5-5    | 0.387882  | 0.01042  |
| BZW1P1     | 0.387207  | 0.010564 |
| FCRL5      | -0.390431 | 0.010776 |
| RREB1      | -0.390349 | 0.010792 |
| AL591721.1 | 0.385604  | 0.010917 |
| CAP1P2     | -0.389121 | 0.011066 |
| CUL4A      | 0.384363  | 0.011208 |
| CHMP3      | 0.38181   | 0.011827 |
| PYM1       | -0.385409 | 0.011955 |
| CHD1L      | -0.38197  | 0.012965 |
| AL355309.1 | -0.381331 | 0.01314  |
| MRPL50     | -0.381327 | 0.013141 |
| ERICH6-AS1 | 0.377227  | 0.013171 |
| ZYX        | -0.380448 | 0.013369 |
| AC078777.1 | 0.375668  | 0.013602 |
| EIF2D      | -0.379566 | 0.013613 |
| KIAA1671   | 0.374895  | 0.013829 |
| CLPX       | 0.373675  | 0.014188 |
| CDS2       | -0.376705 | 0.014442 |
| TRAV1-2    | 0.372753  | 0.014461 |
| TRBV5-6    | 0.371646  | 0.014813 |
| TTN        | -0.37515  | 0.014918 |
| CHIC2      | -0.374285 | 0.015187 |
| ATP5I      | 0.370176  | 0.015266 |
| BLMH       | -0.373481 | 0.015425 |
| FCN1       | -0.372613 | 0.0157   |
| RAD21      | -0.371824 | 0.015962 |
| ADAR       | 0.367929  | 0.015995 |
| EPHB6      | 0.367784  | 0.016044 |
| HSPA8P11   | 0.367492  | 0.016179 |
| TM9SF1     | -0.370333 | 0.016515 |
| PAXX       | -0.370088 | 0.016602 |
| RPL31P63   | -0.368899 | 0.017052 |
| ST6GALNAC6 | -0.367843 | 0.017429 |
| TRAF5      | -0.366821 | 0.01779  |
| C8orf33    | 0.361402  | 0.01841  |
| DCAF11     | -0.364722 | 0.018528 |
| VPS33B     | -0.364398 | 0.018658 |
| PAK1IP1    | 0.359013  | 0.019342 |
| MT-TM      | -0.362384 | 0.019429 |
| PDK1       | -0.36138  | 0.019815 |

|            |           |          |
|------------|-----------|----------|
| FYCO1      | 0.357252  | 0.020036 |
| FRA10AC1   | -0.360689 | 0.02008  |
| CEP128     | 0.355627  | 0.02072  |
| RPS19P1    | -0.358492 | 0.020968 |
| ZMAT1      | -0.357904 | 0.021195 |
| CLPTM1     | -0.357449 | 0.021366 |
| AC012236.1 | 0.353639  | 0.021527 |
| NCF1       | 0.352521  | 0.021993 |
| NACA       | -0.355528 | 0.02219  |
| AC117382.1 | -0.355453 | 0.022218 |
| YWHAZ      | 0.35126   | 0.022647 |
| GARNL3     | -0.354613 | 0.022697 |
| RTF1       | -0.353885 | 0.023036 |
| MTERF2     | -0.353446 | 0.023254 |
| EDRF1      | -0.353312 | 0.02331  |
| AIFM2      | 0.349076  | 0.02368  |
| POTEKP     | -0.352027 | 0.023898 |
| AC098935.1 | 0.348366  | 0.024032 |
| NPIP12     | -0.35147  | 0.024153 |
| DOCK9      | -0.350144 | 0.024769 |
| AC007238.1 | -0.348296 | 0.025613 |
| ZNF611     | -0.345046 | 0.027166 |
| THAP12P7   | 0.341552  | 0.027287 |
| SNHG6      | -0.344761 | 0.027306 |
| MRPL53P1   | -0.344619 | 0.02738  |
| STAT5A     | 0.341106  | 0.027518 |
| TMEM231    | 0.338766  | 0.028835 |
| MTCO3P12   | -0.341462 | 0.029106 |
| AC226101.1 | -0.341243 | 0.029297 |
| CPT2       | 0.337891  | 0.02941  |
| RPL7AP6    | 0.334891  | 0.031113 |
| ZNF7       | -0.337911 | 0.031181 |
| DARS2      | 0.334616  | 0.031276 |
| NCF1C      | 0.334227  | 0.031497 |
| MAP3K4     | 0.333725  | 0.031806 |
| AC022400.8 | -0.336168 | 0.032203 |
| TTC4P1     | -0.336067 | 0.032268 |
| BRWD3      | 0.332722  | 0.032411 |
| RSBN1L     | -0.335697 | 0.032479 |
| RPL7P10    | -0.335433 | 0.032625 |
| ERBIN      | 0.33228   | 0.032669 |
| DDAH2      | -0.333658 | 0.033728 |

|            |           |          |
|------------|-----------|----------|
| CNOT6LP1   | 0.330241  | 0.033965 |
| MON1B      | -0.333005 | 0.03415  |
| PNPLA7     | 0.329018  | 0.034958 |
| FAM122A    | 0.327539  | 0.036231 |
| HMGA1P2    | 0.327343  | 0.036385 |
| RPS24      | -0.329456 | 0.037036 |
| AC025198.1 | 0.325874  | 0.03747  |
| ENSA       | 0.325594  | 0.037671 |
| AC126755.1 | 0.325325  | 0.037875 |
| PHKG1      | 0.324816  | 0.038253 |
| RPS12      | -0.324691 | 0.040483 |
| PTMAP5     | -0.323598 | 0.041311 |
| TSC22D1    | 0.319371  | 0.042367 |
| FGFRL1     | -0.322117 | 0.042449 |
| RGPD6      | 0.318964  | 0.042686 |
| PTEN       | 0.316831  | 0.044417 |
| C6orf62    | 0.315987  | 0.045152 |
| DNM1P46    | -0.318702 | 0.045213 |
| AL031056.1 | 0.315844  | 0.045268 |
| ETV3L      | 0.315467  | 0.0456   |
| DEPDC5     | -0.318043 | 0.045777 |
| MTRNR2L8   | 0.3136    | 0.047182 |
| MT-RNR2    | 0.312105  | 0.048664 |
| TM2D1      | -0.31279  | 0.050505 |
| ANK3       | -0.309967 | 0.053062 |
| SNHG5      | -0.308995 | 0.053929 |
| LINC02536  | -0.306197 | 0.056814 |
| ENOSF1     | -0.304954 | 0.058262 |
| CCL5       | -0.304714 | 0.058516 |
| CFAP161    | -0.30337  | 0.059945 |
| HECTD4     | -0.302914 | 0.060438 |
| IFT52      | -0.301805 | 0.06163  |
| SLC36A3    | -0.298066 | 0.065721 |
| SNRPD2     | -0.293977 | 0.070485 |
| SCARNA7    | -0.293105 | 0.071565 |
| ABHD11     | -0.292269 | 0.072551 |
